# Supplementary material for: Assessing commercial fishery impacts on Amazonian floodplain lakes: taxonomic and functional diversity
Source: Research Square preprint supplement (doi:10.21203/rs.3.rs-8789483/v1), 2026-02-19
Supplement: Supplementary file 1 [file 9683aa6c4a453ee0ed0e1f22.docx]

**Fishing management as an agent for recovery of fish diversity. Lessons from Amazonian floodplain lakes**

**Supplementary Material S1**

**Life story strategy**

In the life history strategy, the characteristics that can influence organisms in relation to the response to temporal and spatial variability of the environment are taken into account, such as maximum body length, length at the time of maturation, fecundity and parental care (Tedesco et al., 2017; Winemiller, 1989; Winemiller & Rose, 1992). Considering the listed functional attributes, the species were classified following Röpke et al. (2017): small equilibrium strategists -with maturation at under <12 cm standard length (SL); low fecundity of the spawning batch (<3,000); large oocytes (diameter greater than 1.5 mm); developed parental care and maximum size of the individual up to 30 cm (SL). Large equilibrium strategists - with maturation at over >17 cm (SL); with low fecundity of the spawning batch (<3,000); large oocytes (diameter greater than 1.5 mm), well-developed parental care and maximum size greater than 40 cm (SL). Small periodic strategists - with maturation up to 15 mm (SL), with moderate to high fecundity of the spawning batch; small oocytes (diameter of 0.5-1.3 mm); maximum size up to 30 cm (SL). Large periodic strategists - with maturation at >16 cm (SL), with high fecundity of the spawning batch; small oocytes (diameter 0.7-1.6 mm), no parental care and maximum size greater than 30 cm (SL). Intermediate strategists, between equilibrium and periodic - with low to moderate fecundity of the spawning batch (<9,000); relatively large oocytes (diameter 1.4-2.0 mm) and moderate development of parental care, with a period of care ending with the hatching of eggs or limits the choice of spawning habitats for hiding eggs.

**Trophic strategy**

The food classification of the species was carried out on the basis of information published in the literature and in the FishBase database (https://www.fishbase.se/search.php). In the context of this study, the species were classified as follows: herbivores - feed on superior vegetables such as leaves, seeds, filamentous algae and fruits of aquatic and terrestrial plants (Augustine et al., 1999; Arantes et al., 2018). Omnivorous - feed on items of animal and vegetable origin in similar proportions, with a mixed diet profile and few specialized structures. They often consume small invertebrates, plants and fruits (Augustine et al., 1999; Arantes et al., 2018; Rotta, 2003). Detritivores - consumers of detritus in the form of partially degraded organic matter of different types of plant and animal tissue, microorganisms and mineral fractions (Agostinho et al., 1999; Amadeu Santana et al., 2015; Arantes et al., 2018). Invertivores - ingest variable fractions of aquatic and terrestrial insects, benthic or water column microcrustaceans, spiders, shrimps and mollusks (Arantes et al., 2018). Planktivores - ingest phytoplankton, zooplankton and occasionally small amounts of plant material and debris, by oral-gill filtration (Agostinho et al., 1999; Arantes et al., 2018). Piscivorous - feed predominantly on fish, either whole or in pieces, including body structures of individuals such as scales, vertebrae and fins (Agostinho et al., 1999; Arantes et al., 2018). Carnivores - feed on items of animal origin such as larger invertebrates and fish, and are able to specialize in some particular types. These preferences may change with seasonal food availability (Augustine et al., 1999; Arantes et al., 2018).

**Migration strategy**

Species dispersal behavior is often associated with aspects of reproductive ecology and/or feeding. This behavior can be divided between sedentary species, which inhabit lakes and areas seasonally flooded by rivers, and migratory species, which are those that carry out seasonal synchronized movements between different habitats, ranging from small distances to hundreds of kilometers (Duponchelle et al., 2021). Sedentary fish are relative to resident species that eventually perform movements of short distances. They are species that exhibit territorial behavior, and are known to be strongly associated with substrates or complex structured habitats such as those with herbaceous plants (Arantes et al., 2018). Species that perform local migration comprise a diverse group of fish that migrate laterally between floodplain lakes or fluvial channels following seasonal fluctuations (Carolsfeld, 2003; Fernandes, 1997; Junk et al., 1989). Species that perform regional migration will migrate to floodplain habitats during the high-water period, but also perform longitudinal migrations (often hundreds of kilometers) along river channels to spawn (Barthem & Fabré, 2004; de Brito Ribeiro & Junior, 1990; Goulding, 1980). Long-distance migrants are species that migrate thousands of kilometers along river channels, although their juveniles often inhabit floodplain lakes (Arantes et al., 2018; Barthem et al., 2017; Borges Barthem et al., 1991).

**Body shape**

Fish body shapes play a crucial role in understanding how they move and adapt in different aquatic environments. Therefore, their characteristics may vary depending on the species. In the study, the classifications used by Baumgartner et al. (2012), de Azevedo Bemvenuti and Fischer (2010) and Froese; Pauly (2010) were adopted.

Fusiform: this is a torpedo-shaped body, with a tapered head and an elongated and narrow body (e.g., *Curimata vittata* Kner, 1858). Compressed and elongated: this body shape is characterized by being more laterally compressed and elongated (e.g., *Rhaphiodon vulpinus* Spix & Agassiz, 1829). Anguilliform: this is an elongated body with compressed head and body, absence of dorsal fin and more extensive and thin caudal region (e.g., *Eigenmannia limbata* Schreiner & Miranda Ribeiro, 1903). Rhomboid: this is characterized by having the tallest body, slightly compressed, wide in the lateral direction and truncated (e.g., *Colossoma macropomum*). Elliptical: disc-shaped or oval body, compressed laterally and high (e.g., *Mylossoma aureum* Spix & Agassiz, 1829). Moderately depressed: this has an elongated body, high at the base of the dorsal fin, inclined dorsal region and slightly concave from the tip of the muzzle to the origin of the dorsal fin, slightly flattened dorsum ventrally, and depressed in the head region (e.g., *Pimelodina flavipinnis* Steindachner, 1876). Depressed: these are dorso-ventrally flattened fish, they have a flattened body from top to bottom, an elongated skull and a depressed caudal pendulum. Depressed-bodied fish preferentially inhabit regions close to the sediment (e.g., *Hypoptopoma gulare* Cope, 1878). Cylindrical: these are fish that have an elongated and rounded body, with a circular (or almost circular) cross section, slightly depressed with a wide head and depressed in the posterior region (e.g., *Hoplias malabaricus* Bloch, 1794). Cylindrical and elongated: they are fish that have an elongated and rounded body and with compression in the posterior region (e.g., *Lepidosiren paradoxa* Fitzinger, 1837).

**Mouth position**

The position of the mouth in a species is closely related to its feeding strategy (de Azevedo Bemvenuti; Fischer, 2010). The classifications adopted were those proposed by Baumgartner et al. (2012), de Azevedo Bemvenuti; Fischer (2010) and Froese; Pauly (2010). Superior mouth: whose opening is facing the upper region of the head, above/behind the transverse plane that passes through the most anterior end of the head. These feed on what is above the individual. Terminal mouth: whose opening is located in the most anterior region of the head, in general they feed in the water column. Inferior mouth: located ventrally, i.e., in the lower region of the head, these usually feed on what is below them, at the bottom.

**Classification of species**

The species were classified according to five life history strategies: equilibrium strategists with small maturation (17 species) and with large maturation (8 species), periodic strategists with maturation at a small size (53 species) and with maturation at a large size (33 species), and intermediate strategists (28 species). The species were classified according to six feeding strategies: herbivores (14 species), omnivores (36 species), detritivores (23 species), invertivores (17 species), planktivores (8 species) and piscivores (41 species). The species were classified according to three migratory behaviors: sedentary (39 species), local migrants (93 species) and regional migrants (7 species). The species were classified according to eight body shapes: compressed and elongated (6 species), anguilliform (5 species), cylindrical (2 species), depressed (19 species), elliptical (26 species), fusiform (52 species), moderately depressed (23 species) and species with a rhomboid body (6 species). Finally, the species were classified according to three mouth positions: inferior (60 species), superior (21 species) and fish with a terminal mouth (58 species).

**References**

Agostinho, A. A., Júlio, H. F., & Lowe-McConnel, R. H. (1999). *Estudos de comunidades de peixes tropicais*.

Amadeu Santana, A. R., Werth, M., & Benedito-Cecilio, E. (2015). Use of food resources by detritivorous fish in floodplains: a synthesis. *Acta Biológica Colombiana*, *20*(1), 5–14.

Arantes, C. C., Winemiller, K. O., Petrere, M., Castello, L., Hess, L. L., & Freitas, C. E. C. (2018). Relationships between forest cover and fish diversity in the Amazon River floodplain. *Journal of Applied Ecology*, *55*(1), 386–395. https://doi.org/10.1111/1365-2664.12967

Barthem, R. B., & Fabré, N. N. (2004). Biologia e diversidade dos recursos pesqueiros da Amazônia. *A Pesca e Os Recursos Pesqueiros Na Amazônia Brasileira*, *1*, 17–62.

Barthem, R. B., Goulding, M., Leite, R. G., Cañas, C., Forsberg, B., Venticinque, E., Petry, P., Ribeiro, M. L. D. B., Chuctaya, J., & Mercado, A. (2017). Goliath catfish spawning in the far western Amazon confirmed by the distribution of mature adults, drifting larvae and migrating juveniles. *Scientific Reports*, *7*. https://doi.org/10.1038/srep41784

Baumgartner, G., Pavanelli, C. S., Baumgartner, D., Bifi, A. G., Debona, T., & Frana, V. A. (2012). *Peixes do baixo rio Iguaçu*. Eduem.

Borges Barthem, R., C6sar, M., De, L., Ribeiro, B., & Petrere, M. (1991). Life Strategies of some Long-Distance Migratory Catfish in Relation to Hydroelectric Dams in the Amazon Basin. In *Biological Conservation* (Vol. 55). https://doi.org/10.1016/0006-3207(91)90037-A

Carolsfeld, J. (2003). *Migratory fishes of South America: biology, fisheries and conservation status*. Idrc.

de Azevedo BEMVENUTI, M., & FISCHER, L. G. (2010). Peixes: morfologia e adaptações. *Cadernos de Ecologia Aquática*, *5*(2), 31–54.

de Brito Ribeiro, M. C. L., & Junior, M. P. (1990). Fisheries ecololgy and management of the Jaraqui (Semaprochilodus Taeniurus, S. Insignis) in central Amazonia. *Regulated Rivers: Research & Management*, *5*(3), 195–215. https://doi.org/10.1002/rrr.3450050302

Duponchelle, F., Isaac, V. J., Doria, C., Van Damme, P. A., Herrera-R, G. A., Anderson, E. P., Cruz, R. E. A., Hauser, M., Hermann, T. W., Agudelo, E., Bonilla-Castillo, C., Barthem, R., Freitas, C. E. C., García-Dávila, C., García-Vasquez, A., Renno, J. F., & Castello, L. (2021). Conservation of migratory fishes in the Amazon basin. *Aquatic Conservation: Marine and Freshwater Ecosystems*. https://doi.org/10.1002/aqc.3550

Fernandes, C. C. (1997). Lateral migration of fishes in Amazon floodplains. *Ecology of Freshwater Fish*, *6*(1), 36–44. https://doi.org/10.1111/j.1600-0633.1997.tb00140.x

Froese, R., & Pauly, D. (2010). *FishBase*. Fisheries Centre, University of British Columbia Vancouver, BC, Canada.

Goulding, M. (1980). *The fishes and the forest: explorations in Amazonian natural history*. Univ of California Press.

Junk, W. J., Bayley, P. B., & Sparks, R. E. (1989). The flood pulse concept in river-floodplain systems. *Canadian Special Publication of Fisheries and Aquatic Sciences*, *106*(1), 110–127.

ROTTA, M. A. (2003). *Aspectos gerais da fisiologia e estrutura do sistema digestivo dos peixes relacionados à piscicultura.*

Tedesco, P. A., Beauchard, O., Bigorne, R., Blanchet, S., Buisson, L., Conti, L., Cornu, J. F., Dias, M. S., Grenouillet, G., Hugueny, B., Jézéquel, C., Leprieur, F., Brosse, S., & Oberdorff, T. (2017). Data Descriptor: A global database on freshwater fish species occurrence in drainage basins. *Scientific Data*, *4*. https://doi.org/10.1038/sdata.2017.141

Winemiller, K. O. (1989). Patterns of variation in life history among South American fishes in seasonal environments. *Oecologia*, *81*(2), 225–241. https://doi.org/10.1007/BF00379810

Winemiller, K. O., & Rose, K. A. (1992). Patterns of Life-History Diversification in North American Fishes: implications for Population Regulation. *Canadian Journal of Fisheries and Aquatic Sciences*, *49*(10), 2196–2218. https://doi.org/10.1139/f92-24

**Supplementary Material S2**

| Table 1. Characteristics of fish species sampled in lakes with unrestricted and restricted access for fishing. | | | | | | |
| --- | --- | --- | --- | --- | --- | --- |
| **SPECIES** | **Acronym** | **Trophic strategy** | **Life history** | **Migration strategy** | **Body shape** | **Mouth position** |
| **Osteoglossiformes** |  |  |  |  |  |  |
| **Osteoglossidae** |  |  |  |  |  |  |
| *Osteoglossum bicirrhosum* | OB | Invertivore1, 2 | Large equilibrium1,2 | Local1 | Compressed and elongated3 | Superior3 |
| **Clupeiformes** |  |  |  |  |  |  |
| **Pristigasteridae** |  |  |  |  |  |  |
| *Ilisha amazonica* | IA | Invertivore2 | Small periodic1,2 | Local1 | Fusiform3 | Terminal3 |
| *Pellona castelnaeana* | PC | Piscivore1,2 | Large periodic1,2 | Local1 | Fusiform3 | Superior3 |
| *Pellona flavipinnis* | PF | Piscivore1, 2 | Small periodic1,2 | Local1 | Fusiform3 | Superior3 |
| *Pristigaster cayana* | PCA | Invertivore1 | Small periodic1 | Local1 | Fusiform3 | Superior3 |
| **Engraulidae** |  |  |  |  |  |  |
| *Jurengraulis juruensis* | JJ | Planktivore1, 2 | Small periodic1, 2 | Local1 | Fusiform3 | Inferior3 |
| *Lycengraulis batesii* | LB | Invertivore1, 2 | Small periodic1, 2 | Local1 | Fusiform3 | Inferior3 |
| **Characiformes** |  |  |  |  |  |  |
| **Hemiodontidae** |  |  |  |  |  |  |
| *Anodus elongatus* | AE | Planktivore1, 2 | Small periodic1, 2 | Local1 | Fusiform3 | Inferior3 |
| *Hemiodus argenteus* | HA | Omnivore1 | Small periodic1 | Local1 | Fusiform3 | Terminal3 |
| *Hemiodus atranalis* | HAT | Omnivore5 | Small periodic1,2 | Local1 | Fusiform3 | Terminal3 |
| *Hemiodus immaculatus* | HI | Omnivore1,2 | Small periodic1,2 | Local1 | Fusiform3 | Terminal3 |
| *Hemiodus unimaculatus* | HU | Omnivore1 | Small periodic1 | Local1 | Fusiform3 | Terminal3 |
| **Curimatidae** |  |  |  |  |  |  |
| *Curimata inornata* | CI | Detritivore1 | Small periodic1 | Local1 | Fusiform3 | Inferior3 |
| *Curimata knerii* | CK | Detritivore1 | Small periodic1 | Local1 | Fusiform3 | Inferior3 |
| *Curimata ocellata* | CO | Detritivore2 | Small periodic2 | Local4 | Fusiform3 | Inferior3 |
| *Curimata vittata* | CV | Detritivore1,2 | Small periodic1,2 | Local1 | Fusiform3 | Inferior3 |
| *Curimatella alburna* | CA | Detritivore1 | Small periodic1 | Local1 | Fusiform3 | Inferior3 |
| *Curimatella meyeri* | CM | Detritivore1,2 | Small periodic1,2 | Local1 | Fusiform3 | Inferior3 |
| *Cyphocharax spiluropsis* | CSP | Detritivore1 | Small periodic1 | Local1 | Fusiform3 | Inferior3 |
| *Potamorhina altamazonica* | PA | Detritivore1,2 | Small periodic1,2 | Local1 | Fusiform3 | Inferior3 |
| *Potamorhina latior* | PL | Detritivore1,2 | Small periodic1,2 | Local1 | Fusiform3 | Inferior3 |
| *Psectrogaster amazonica* | PAM | Detritivore1,2 | Small periodic1,2 | Local1 | Rhomboid3 | Inferior3 |
| *Psectrogaster rutiloides* | PRU | Detritivore1,2 | Small periodic1,2 | Local1 | Fusiform3 | Inferior3 |
| *Steindachnerina bimaculata* | SB | Detritivore1 | Small periodic1 | Local1 | Fusiform1 | Inferior3 |
| **Prochilodontidae** |  |  |  |  |  |  |
| *Prochilodus nigricans* | PN | Detritivore1,2 | Large periodic1,2 | Regional1 | Fusiform3 | Inferior3 |
| *Semaprochilodus insignis* | SI | Detritivore1,2 | Large periodic1,2 | Regional1 | Fusiform3 | Inferior3 |
| *Semaprochilodus taeniurus* | ST | Detritivore1,2 | Large periodic1,2 | Regional1 | Fusiform3 | Inferior3 |
| **Anostomidae** |  |  |  |  |  |  |
| *Leporinus amazonicus* | LA | Omnivore1 | Small periodic1 | Local1 | Fusiform3 | Terminal3 |
| *Laemolyta proxima* | LP | Herbivore6 | Small periodic1 | Local1 | Fusiform3 | Terminal3 |
| *Leporinus fasciatus* | LF | Omnivore1 | Large periodic1 | Local1 | Fusiform3 | Terminal3 |
| *Leporinus friderici* | LFR | Omnivore1 | Large periodic1 | Local1 | Fusiform3 | Terminal3 |
| *Megaleporinus trifasciatus* | MT | Piscivore1 | Large periodic1 | Local1 | Fusiform3 | Terminal3 |
| *Rhytiodus argenteofuscus* | RA | Herbivore1 | Small periodic1 | Local1 | Fusiform3 | Terminal3 |
| *Rhytiodus microlepis* | RM | Herbivore1 | Small periodic1 | Local1 | Fusiform3 | Terminal3 |
| *Schizodon fasciatus* | SF | Herbivore1 | Small periodic1 | Local1 | Fusiform3 | Terminal3 |
| **Erythrinidae** |  |  |  |  |  |  |
| *Hoplerythrinus unitaeniatus* | HUN | Piscivore7 | Intermediate1 | Sedentary8 | Cylindrical3 | Terminal3 |
| *Hoplias malabaricus* | HM | Piscivore1 | Intermediate1 | Sedentary1 | Cylindrical3 | Terminal3 |
| **Acestrorhynchidae** |  |  |  |  |  |  |
| *Acestrorhynchus abbreviatus* | AA | Piscivore1 | Small periodic1 | Local1 | Fusiform3 | Terminal3 |
| *Acestrorhynchus falcirostris* | AFA | Piscivore1,2 | Small periodic1,2 | Local1 | Fusiform3 | Terminal3 |
| *Acestrorhynchus microlepis* | AM | Piscivore2 | Small periodic2 | Local1 | Fusiform3 | Terminal3 |
| **Cynodontidae** |  |  |  |  |  |  |
| *Cynodon gibbus* | CG | Piscivore1 | Large periodic1 | Local1 | Compressed and elongated3 | Superior3 |
| *Hydrolycus scomberoides* | HS | Piscivore1 | Large periodic1 | Local1 | Compressed and elongated3 | Superior3 |
| *Rhaphiodon vulpinus* | RV | Piscivore1 | Large periodic1 | Local1 | Compressed and elongated3 | Superior3 |
| **Bryconidae** |  |  |  |  |  |  |
| *Brycon amazonicus* | BA | Omnivore9 | Large periodic1 | Regional1 | Fusiform3 | Terminal3 |
| *Brycon melanopterus* | BM | Omnivore9 | Large periodic1 | Regional1 | Fusiform3 | Terminal3 |
| **Iguanodectidae** |  |  |  |  |  |  |
| *Bryconops melanurus* | BME | Omnivore10 | Small periodic10 | Local1 | Fusiform3 | Terminal3 |
| **Serrasalmidae** |  |  |  |  |  |  |
| *Colossoma macropomum* | CMA | Herbivore1 | Large periodic1 | Regional1 | Rhomboid3 | Superior3 |
| *Metynnis argenteus* | MA | Herbivore1 | Intermediate1 | Local1 | Elliptical3 | Terminal3 |
| *Metynnis hypsauchen* | MH | Herbivore1 | Intermediate1 | Local1 | Elliptical3 | Terminal3 |
| *Myloplus asterias* | MAS | Herbivore1 | Large periodic1 | Local1 | Elliptical3 | Terminal3 |
| *Myloplus rubripinnis* | MR | Herbivore1 | Large periodic1 | Local1 | Elliptical3 | Terminal3 |
| *Mylossoma albiscopum* | MAL | Herbivore1 | Small periodic1 | Local1 | Elliptical3 | Terminal3 |
| *Mylossoma aureum* | MAU | Herbivore1 | Small periodic1 | Local1 | Elliptical3 | Terminal3 |
| *Piaractus brachypomus* | PB | Herbivore1 | Large periodic1 | Regional1 | Rhomboid3 | Superior3 |
| *Pygocentrus nattereri* | PNA | Piscivore1 | Intermediate1 | Local1 | Rhomboid3 | Superior3 |
| *Serrasalmus altispinis* | SA | Piscivore1 | Intermediate1 | Local1 | Elliptical3 | Superior3 |
| *Serrasalmus compressus* | SC | Piscivore1 | Intermediate1 | Local1 | Elliptical3 | Superior3 |
| *Serrasalmus elongatus* | SE | Piscivore1 | Intermediate1 | Local1 | Fusiform3 | Superior3 |
| *Serrasalmus hollandi* | SH | Piscivore1 | Intermediate1 | Local1 | Elliptical3 | Superior3 |
| *Serrasalmus maculatus* | SM | Piscivore1 | Intermediate1 | Local1 | Rhomboid3 | Superior3 |
| *Serrasalmus rhombeus* | SR | Piscivore1 | Intermediate1 | Local1 | Rhomboid3 | Superior3 |
| **Chalceidae** |  |  |  |  |  |  |
| *Chalceus erythrurus* | CE | Omnivore11 | Small periodic11 | Local11 | Fusiform3 | Terminal3 |
| *Chalceus macrolepidotus* | CML | Omnivore11 | Small periodic11 | Local11 | Fusiform3 | Terminal3 |
| **Characidae** |  |  |  |  |  |  |
| *Roeboides myersii* | RMY | Piscivore1 | Small periodic1 | Local1 | Fusiform3 | Superior3 |
| *Tetragonopterus argenteus* | TA | Omnivore1 | Small periodic1 | Local1 | Elliptical3 | Terminal3 |
| **Triportheidae** |  |  |  |  |  |  |
| *Agoniates anchovia* | AAN | Piscivore1,2 | Small periodic1,2 | Local1 | Compressed and elongated3 | Superior3 |
| *Triportheus albus* | TAL | Omnivore1,2 | Small periodic1,2 | Local1 | Fusiform3 | Superior3 |
| *Triportheus angulatus* | TAN | Omnivore1,2 | Small periodic1,2 | Local1 | Fusiform3 | Superior3 |
| *Triportheus auritus* | TAU1 | Omnivore1 | Small periodic1 | Local1 | Fusiform 3 | Superior3 |
| **Siluriformes** |  |  |  |  |  |  |
| **Doradidae** |  |  |  |  |  |  |
| *Amblydoras affinis* | AAF | Omnivore1 | Small periodic1 | Sedentary1 | Depressed3 | Inferior3 |
| *Anadoras grypus* | AGR | Omnivore1 | Small periodic1 | Sedentary1 | Depressed3 | Inferior3 |
| *Nemadoras elongatus* | NE | Omnivore2 | Small periodic2 | Local3 | Depressed3 | Inferior3 |
| *Nemadoras hemipeltis* | NH | Omnivore2 | Small periodic2 | Local3 | Depressed3 | Inferior3 |
| *Nemadoras humeralis* | NHU | Omnivore2 | Small periodic2 | Local2 | Depressed3 | Inferior3 |
| *Opsodoras boulengeri* | OB | Invertivore1 | Small periodic1 | Local1 | Depressed3 | Inferior3 |
| *Ossancora asterophysa* | OA | Invertivore1 | Intermediate1 | Sedentary1 | Moderately depressed3 | Inferior3 |
| *Ossancora punctata* | OP | Invertivore1 | Intermediate1 | Sedentary1 | Moderately depressed3 | Inferior3 |
| *Oxydoras niger* | ON | Omnivore1 | Large periodic1 | Local1 | Depressed3 | Inferior3 |
| *Pterodoras granulosus* | PG | Herbivore1 | Large periodic1 | Local1 | Depressed3 | Inferior3 |
| **Auchenipteridae** |  |  |  |  |  |  |
| *Auchenipterichthys coracoideus* | AC | Omnivore2 | Intermediate2 | Sedentary1 | Depressed3 | Inferior3 |
| *Ageneiosus dentatus* | AD | Piscivore1 | Intermediate1 | Sedentary1 | Moderately depressed3 | Inferior3 |
| *Ageneiosus inermis* | AI | Piscivore1 | Large periodic1 | Local1 | Moderately depressed3 | Inferior3 |
| *Ageneiosus ucayalensis* | AU | Piscivore1 | Intermediate1 | Local1 | Moderately depressed3 | Inferior3 |
| *Auchenipterus britskii* | AB | Invertivore1 | Intermediate1 | Sedentary4 | Moderately depressed3 | Inferior3 |
| *Auchenipterus nuchalis* | AN | Invertivore1 | Intermediate1 | Sedentary1 | Moderately depressed3 | Inferior3 |
| *Centromochlus heckelii* | CH | Omnivore1 | Intermediate1 | Local1 | Moderately depressed3 | Inferior3 |
| *Trachelyopterus galeatus* | TG | Omnivore1 | Intermediate1 | Sedentary1 | Moderately depressed3 | Inferior3 |
| *Trachelyopterus porosus* | TP | Invertivore2 | Intermediate2 | Sedentary1 | Moderately depressed3 | Inferior3 |
| *Tympanopleura brevis* | TB | Piscivore1 | Intermediate1 | Local1 | Moderately depressed3 | Inferior3 |
| *Tympanopleura rondoni* | TR | Piscivore1 | Intermediate1 | Local1 | Moderately depressed3 | Inferior3 |
| **Pimelodidae** |  |  |  |  |  |  |
| *Calophysus macropterus* | CMR | Piscivore1 | Large periodic1 | Local1 | Moderately depressed3 | Inferior3 |
| *Hemisorubim platyrhynchos* | HP | Piscivore1 | Large periodic1 | Local1 | Moderately depressed3 | Inferior3 |
| *Hypophthalmus edentatus* | HE | Planktivore1 | Large periodic1 | Local1 | Fusiform3 | Terminal3 |
| *Hypophthalmus fimbriatus* | HF | Planktivore1 | Large periodic1 | Local1 | Fusiform3 | Terminal3 |
| *Hypophthalmus oremaculatus* | HO | Planktivore1 | Large periodic1 | Local1 | Fusiform3 | Terminal3 |
| *Phractocephalus hemioliopterus* | PHE | Piscivore1 | Large periodic1 | Local1 | Depressed3 | Inferior3 |
| *Pimelodina flavipinnis* | PFL | Piscivore1 | Large periodic1 | Local1 | Moderately depressed3 | Inferior3 |
| *Pimelodus blochii* | PBL | Omnivore1 | Small periodic1 | Local1 | Moderately depressed3 | Inferior3 |
| *Pimelodus maculatus* | PM | Omnivore1 | Small periodic1 | Local1 | Moderately depressed3 | Inferior3 |
| *Pinirampus pirinampu* | PP | Piscivore1 | Large periodic1 | Local1 | Moderately depressed3 | Inferior3 |
| *Pseudoplatystoma punctifer* | PPU | Piscivore1 | Large periodic1 | Local1 | Moderately depressed3 | Inferior3 |
| *Pseudoplatystoma tigrinum* | PT | Piscivore1 | Large periodic1 | Local1 | Moderately depressed3 | Inferior3 |
| *Sorubim lima* | SL | Piscivore1 | Large periodic1 | Local1 | Moderately depressed3 | Inferior3 |
| *Sorubim maniradii* | SMA | Piscivore1 | Large periodic1 | Local1 | Moderately depressed3 | Inferior3 |
| **Callichthyidae** |  |  |  |  |  |  |
| *Hoplosternum littorale* | HL | Invertivore12 | Intermediate1 | Sedentary12 | Moderately depressed3 | Inferior3 |
| *Megalechis picta* | MP | Invertivore12 | Intermediate1 | Sedentary12 | Moderately depressed3 | Inferior3 |
| **Loricariidae** |  |  |  |  |  |  |
| *Ancistrus dolichopterus* | ADO | Detritivore2 | Small equilibrium2 | Sedentary4 | Depressed3 | Inferior3 |
| *Dekeyseria amazonica* | DA | Detritivore1 | Small equilibrium1 | Sedentary1 | Depressed3 | Inferior3 |
| *Hypoptopoma gulare* | HG | Detritivore1 | Intermediate1 | Sedentary1 | Depressed3 | Inferior3 |
| *Hypoptopoma incognitum* | HIN | Detritivore3 | Intermediate1 | Sedentary4 | Depressed3 | Inferior3 |
| *Loricaria cataphracta* | LC | Detritivore1 | Small equilibrium1 | Sedentary1 | Depressed3 | Inferior3 |
| *Loricariichthys maculatus* | LM | Detritivore1 | Small equilibrium1 | Sedentary1 | Depressed3 | Inferior3 |
| *Loricariichthys nudirostris* | LN | Detritivore1 | Small equilibrium1 | Sedentary1 | Depressed3 | Inferior3 |
| *Pterygoplichthys pardalis* | PPA | Detritivore1 | Large equilibrium1 | Sedentary1 | Depressed3 | Inferior3 |
| **Gymnotiformes** |  |  |  |  |  |  |
| **Apteronotidae** |  |  |  |  |  |  |
| *Parapteronotus hasemani* | PHA | Invertivore1 | Small periodic1 | Local1 | Anguilliform3 | Terminal3 |
| *Sternarchella schotti* | SS | Invertivore1 | Small periodic1 | Local1 | Anguilliform3 | Terminal3 |
| **Rhamphichthyidae** |  |  |  |  |  |  |
| *Rhamphichthys rostratus* | RR | Invertivore13,14 | Small periodic3 | Local3 | Anguilliform3 | Terminal3 |
| **Sternopygidae** |  |  |  |  |  |  |
| *Eigenmannia limbata* | EL | Invertivore1 | Small periodic1 | Local1 | Anguilliform3 | Terminal3 |
| *Sternopygus macrurus* | SMC | Invertivore15 | Large equilibrium3 | Local3 | Anguilliform3 | Terminal3 |
| **Perciformes** |  |  |  |  |  |  |
| **Sciaenidae** |  |  |  |  |  |  |
| *Plagioscion montei* | PMO | Piscivore2 | Large periodic2 | Local1 | Fusiform3 | Terminal3 |
| *Plagioscion squamosissimus* | PS | Piscivore1 | Large periodic1 | Local1 | Fusiform3 | Terminal3 |
| **Cichlidae** |  |  |  |  |  |  |
| *Acaronia nassa* | ANA | Piscivore1 | Small equilibrium1 | Sedentary1 | Elliptical3 | Terminal3 |
| *Acarichthys heckelii* | AH | Omnivore1 | Small equilibrium1 | Local1 | Elliptical3 | Terminal3 |
| *Astronotus crassipinnis* | ACR | Piscivore3 | Large equilibrium3 | Sedentary3 | Elliptical3 | Terminal3 |
| *Astronotus ocellatus* | AO | Piscivore1 | Large equilibrium1 | Sedentary1 | Elliptical3 | Terminal3 |
| *Chaetobranchopsis orbicularis* | COR | Planktivore1 | Small equilibrium1 | Sedentary1 | Elliptical3 | Terminal3 |
| *Chaetobranchus flavescens* | CF | Planktivore1 | Small equilibrium1 | Sedentary1 | Elliptical3 | Terminal3 |
| *Chaetobranchus semifasciatus* | CS | Planktivore3 | Small equilibrium3 | Sedentary3 | Elliptical3 | Terminal3 |
| *Cichla monoculus* | CMO | Piscivore1 | Large equilibrium1 | Sedentary1 | Fusiform3 | Terminal3 |
| *Cichlasoma amazonarum* | CAM | Omnivore1 | Small equilibrium1 | Sedentary1 | Elliptical3 | Terminal3 |
| *Crenicichla reticulata* | CR | Piscivore1 | Large equilibrium1 | Sedentary1 | Elliptical3 | Terminal3 |
| *Geophagus proximus* | GP | Omnivore1 | Small equilibrium1 | Sedentary1 | Elliptical3 | Terminal3 |
| *Heros notatus* | HN | Omnivore1 | Small equilibrium1 | Sedentary1 | Elliptical3 | Terminal3 |
| *Heros severus* | HSE | Herbivore3 | Intermediate3 | Sedentary3 | Elliptical3 | Terminal3 |
| *Mesonauta festivus* | MF | Omnivore1 | Small equilibrium1 | Sedentary1 | Elliptical3 | Terminal3 |
| *Pterophyllum scalare* | PSC | Omnivore1 | Small equilibrium1 | Sedentary1 | Elliptical3 | Terminal3 |
| *Satanoperca acuticeps* | SAC | Omnivore12 | Small equilibrium12 | Sedentary12 | Elliptical3 | Terminal3 |
| *Satanoperca jurupari* | SJ | Omnivore12 | Small equilibrium12 | Sedentary12 | Elliptical3 | Terminal3 |
| *Ceratodontiformes* |  |  |  |  |  |  |
| *Lepidosiren paradoxa* | LPA | Omnivore16 | Large equilibrium3 | Sedentary16 | Cylindrical and elongated3 | Terminal3 |
|  |  |  |  |  |  |  |

1. Arantes, C. C., Winemiller, K. O., Petrere, M., Castello, L., Hess, L. L., & Freitas, C. E. C. (2018). Relationships between forest cover and fish diversity in the Amazon River floodplain. *Journal of Applied Ecology*, *55*(1), 386–395. https://doi.org/10.1111/1365-2664.12967
2. Röpke, C. P., Amadio, S., Zuanon, J., Ferreira, E. J. G., De Deus, C. P., Pires, T. H. S., & Winemiller, K. O. (2017). Simultaneous abrupt shifts in hydrology and fish assemblage structure in a floodplain lake in the central Amazon. *Scientific Reports*, *7*. https://doi.org/10.1038/srep40170
3. Froese, R., & Pauly, D. (2010). *FishBase*. Fi9sheries Centre, University of British Columbia Vancouver, BC, Canada.
4. Freitas, C. E. C., Laurenson, L., Yamamoto, K. C., Forsberg, B. R., Jr, M. P., Arantes, C., & Siqueira-Souza, F. K. (2018). Fish species richness is associated with the availability of landscape components across seasons in the Amazonian floodplain. *PeerJ*, *2018*(6). https://doi.org/10.7717/peerj.5080
5. Silva, C. C. da, Ferreira, E. J. G., & Deus, C. P. de. (2008). Dieta de cinco espécies de Hemiodontidae (Teleostei, Characiformes) na área de influência do reservatório de Balbina, rio Uatumã, Amazonas, Brasil. *Iheringia. Série Zoologia*, *98*, 465–468. https://doi.org/10.1590/S0073-47212008000400008
6. Marinelli, C. E., Ferreira, K. M., Vieira, D. L. M., Jurinitz, C. F., Guerra, B. R., & Aguiar, A. J. C. (2001). Atributos ecomorfológicos para determinação de guildas tróficas da ictiofauna de igapó no arquipélago das Anavilhanas, Amazônia Central. *Curso de Campo Ecologia Da Floresta Amazônica–2001. Livro Do Curso De*, 59–62.
7. Leal, M. E., Klein, G. F., Schulz, U. H., & Albornoz, P. L. (2010). Primeiro registro e aspectos ecológicos de Hoplerythrinus unitaeniatus (Agassiz, 1829)(Characiformes, Erythrinidae) como espécie introduzida na Bacia do Rio dos Sinos, RS, Brasil. *Biota Neotropica*, *10*, 33–37. https://doi.org/10.1590/S1676-06032010000300002
8. Sato, Y. (2003). Padrões reprodutivos de peixes da bacia do São Francisco. *Águas, Peixes e Pescadores Do São Francisco Das Minas Gerais*, 229–274.
9. Arias, J. A. (2006). Estado actual del conocimiento sobre el yamú, Brycon amazonicus. *Revista Colombiana de Ciencias Pecuarias*, *19*(2), 125–133.
10. Silva, C. C. da, Ferreira, E. J. G., & Deus, C. P. de. (2008). Diet of Bryconops alburnoides and B. caudomaculatus (Osteichthyes: Characiformes) in the region affected by Balbina Hydroelectric Dam (Amazon drainage, Brazil). *Neotropical Ichthyology*, *6*, 237–242. https://doi.org/10.1590/S1679-62252008000200011
11. Hercos, A. P., Queiroz, H. L. de, & Almeida, H. L. de. (2009). *Peixes ornamentais do Amanã*. Instituto de Desenvolvimento Sustentável Mamirauá.
12. Santos, G. M. dos., Ferreira, E. J. G., & Zuanon, J. A. S. (2009). *Peixes comerciais de Manaus*. Editora INPA.
13. LUIZ, E. A., AGOSTINHO, A. A., Gomes, L. C., & Hahn, N. S. (2018). *Ecologia trófica de peixes em dois riachos da bacia do rio Paraná*.
14. Olaya-Nieto, C., Soto-Fernández, P., & Barrera-Chica, J. (2009). Feeding habits of Mayupa (Sternopygus macrurus Bloch & Schneider, 1801) in the Sinu River, Colombia. *Revista MVZ Córdoba*, *14*(3), 1787–1795.
15. Montenegro, L. A., Damasceno, D. N. F., Almeida, R. G., & Chellappa, S. (2011). Biologia alimentar do mussum, Synbranchus marmoratus (Bloch, 1795)(Osteichthyes: Synbranchidae) no açude Marechal Dutra localizado no semi-árido brasileiro. *Biota Amazônia*, *1*(2), 52–60. http://dx.doi.org/10.18561/2179-5746/biotaamazonia.v1n2p45-52
16. Bemis, W. E., & Lauder, G. V. (1986). Morphology and function of the feeding apparatus of the lungfish, Lepidosiren paradoxa (Dipnoi). *Journal of Morphology*, *187*(1), 81–108. https://doi.org/10.1002/jmor.1051870108

**Supplementary Material S3**

**Taxonomic richness (S)**


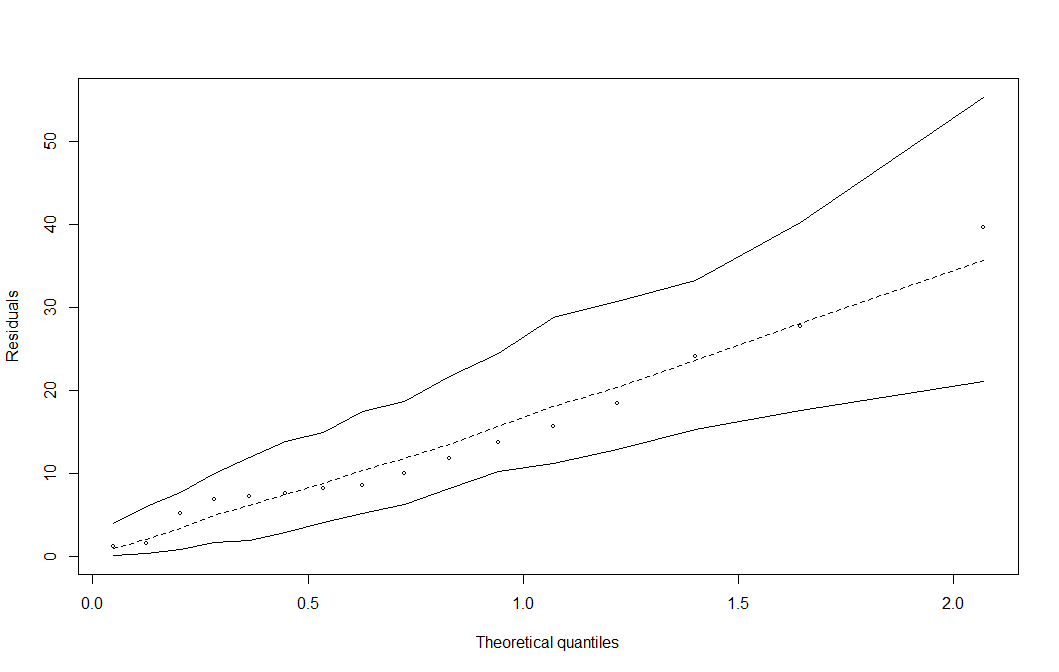


Figure 1. Quantile-quantile plot with simulated envelopes at 99% of the final model adjusted to taxonomic richness data.


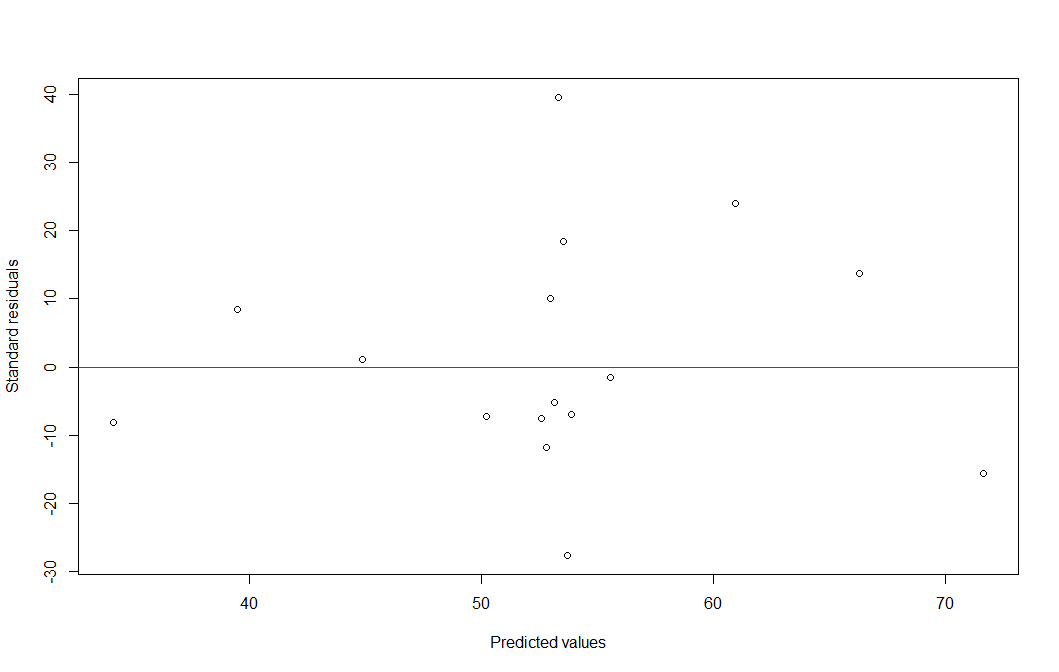


Figure 2. Scatter plot of normalized residuals in relation to the predicted values for the final model adjusted to taxonomic richness data.

**Shannon diversity (H’)**


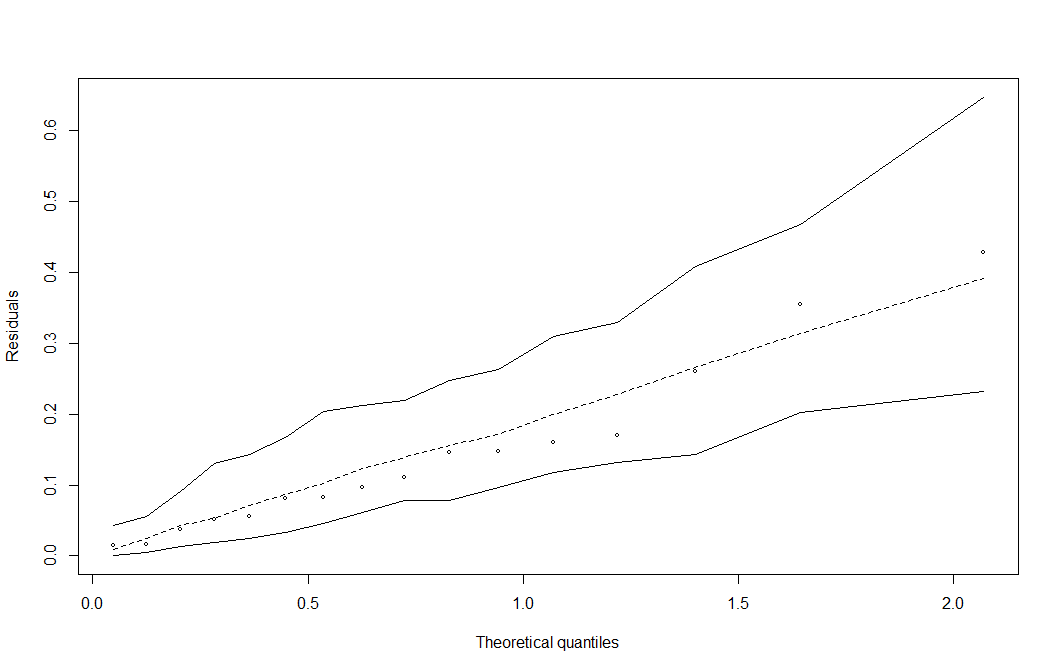


Figure 3. Quantile-quantile plot with envelopes simulated to 99% of the final model fitted to Shannon diversity data.


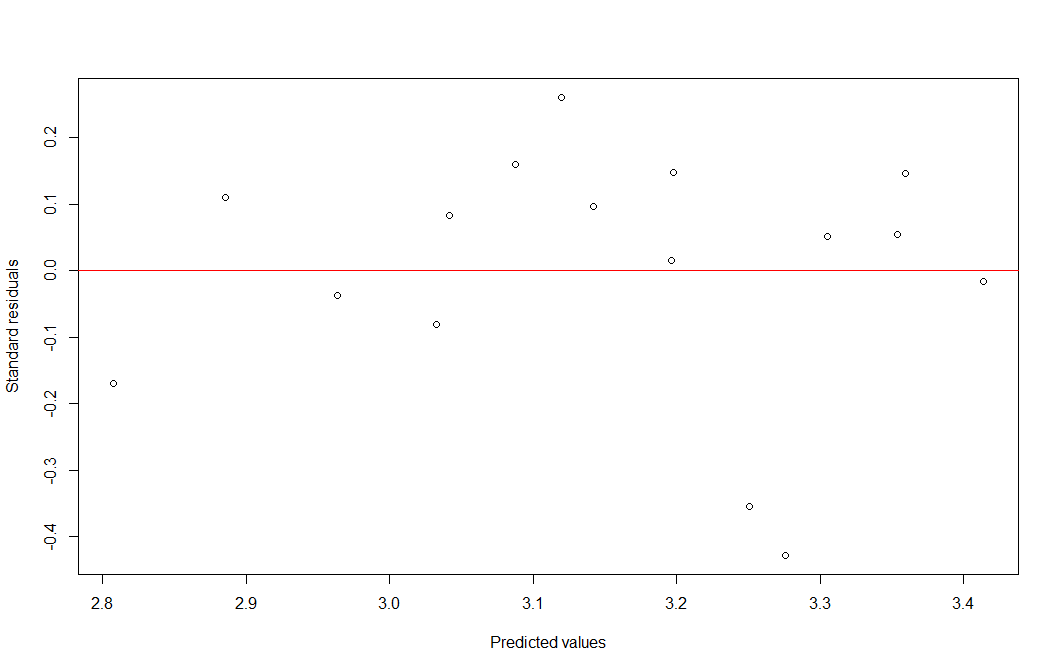


Figure 4. Scatter plot of normalized residuals against predicted values for the final model adjusted to Shannon diversity data.

**Pielou equitability (J’)**


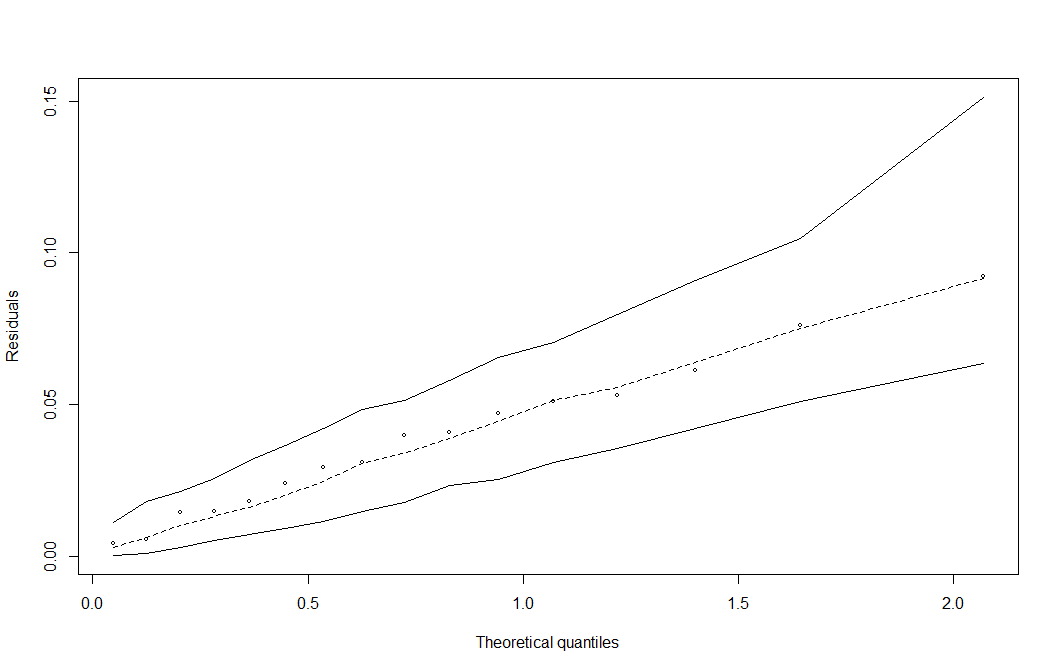


Figure 5. Quantile-quantile graph with envelopes simulated to 99% of the final model adjusted to Pielou equitability data.


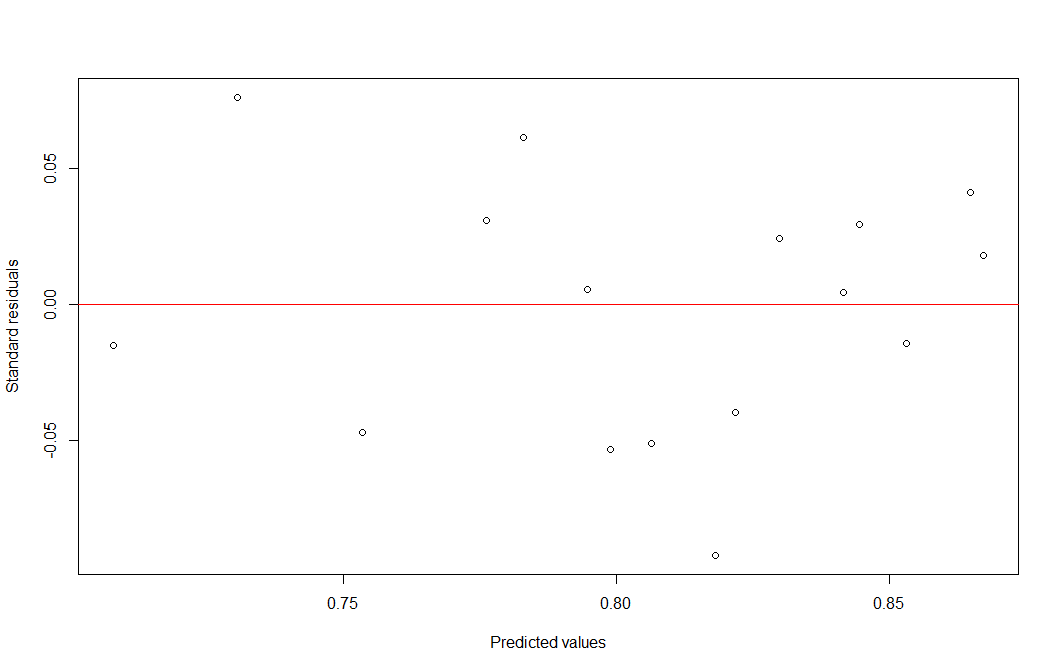


Figure 6. Scatter plot of the normalized residuals in relation to the predicted values for the final model adjusted to the Pielou equitability data.

**Functional richness (FRIc)**


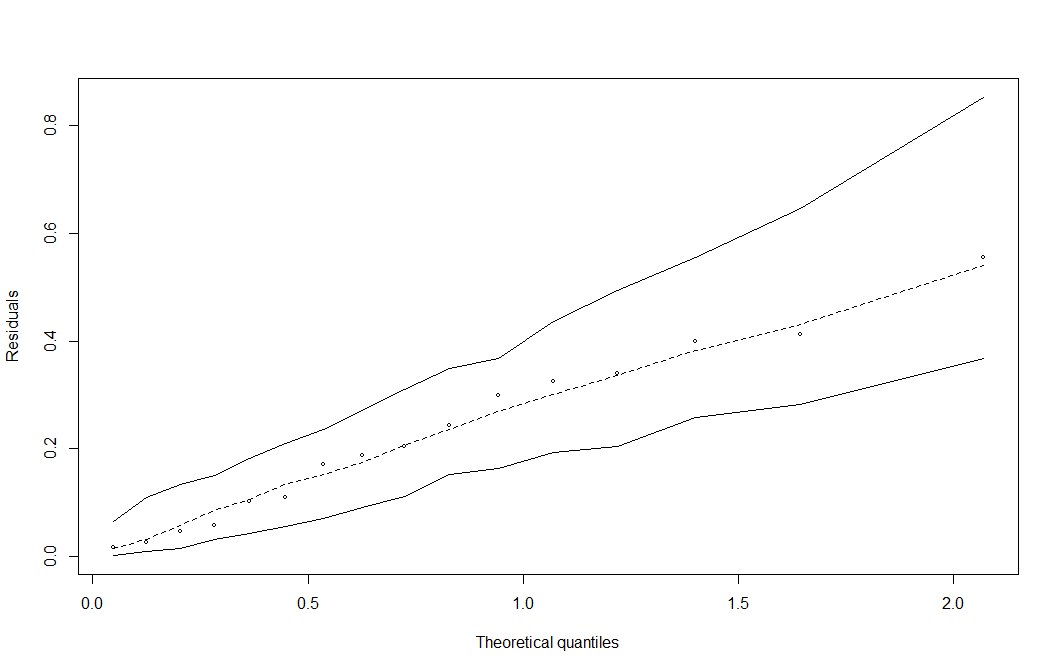


Figure 7. Quantile-quantile graph with envelopes simulated to 99% of the final model adjusted to functional richness data.


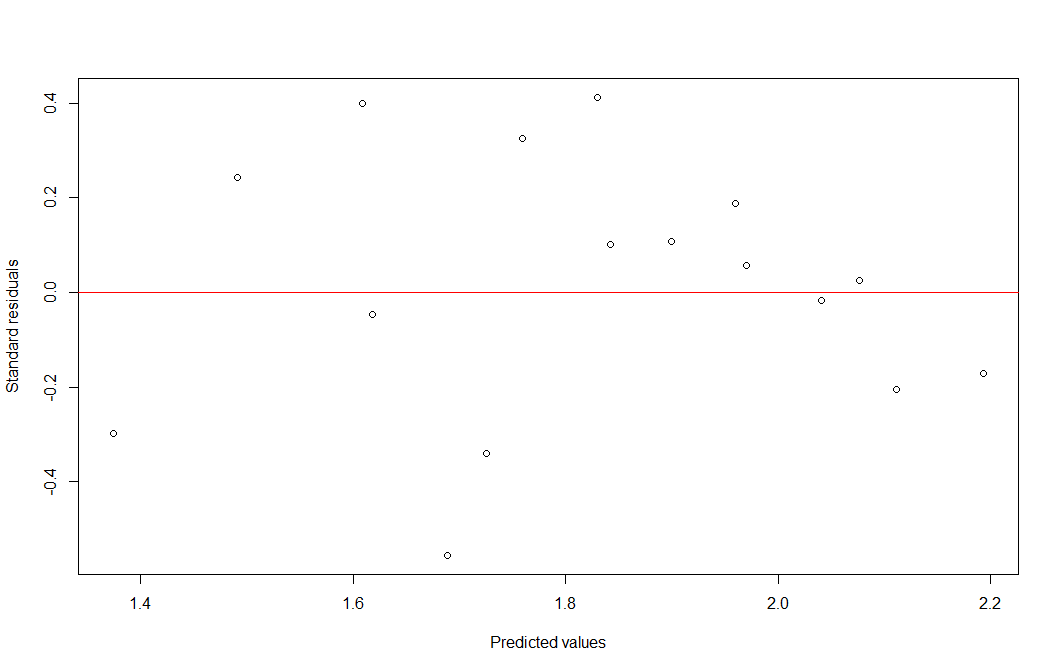


Figure 8. Scatter plot of the normalized residuals in relation to the predicted values for the final model adjusted to the functional richness data.

**Functional divergence (FDiv)**


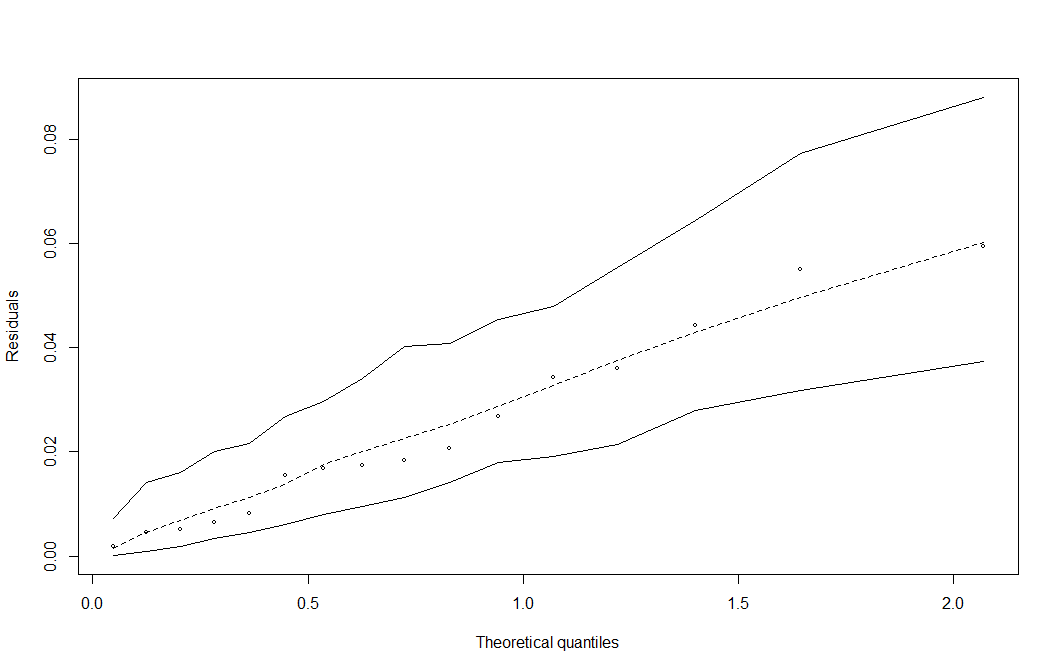


Figure 9. Quantile-quantile plot with envelopes simulated to 99% of the final model adjusted to functional divergence data.


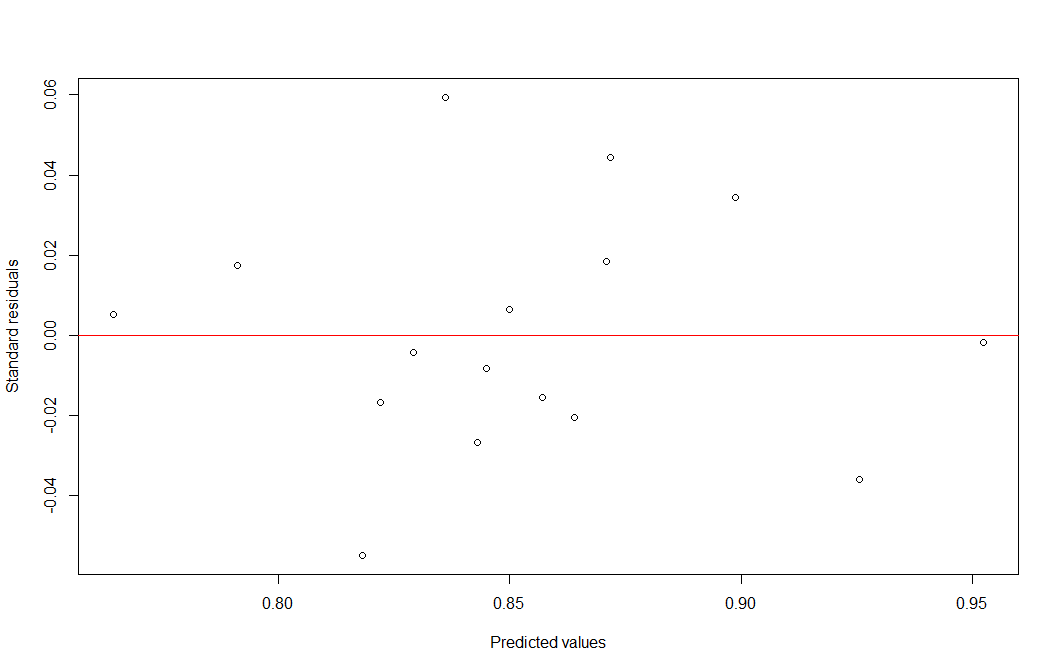


Figure 10. Scatter plot of normalized residuals against predicted values for the final model adjusted for functional divergence data.

**Functional dispersion (FDis)**


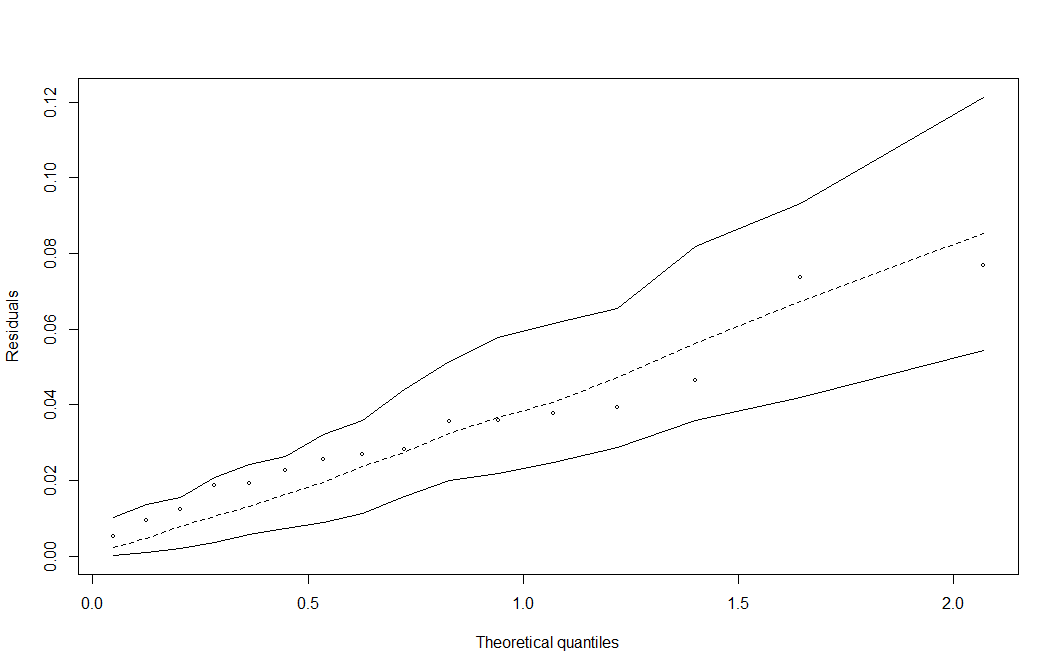


Figure 11. Quantile-quantile plot with envelopes simulated to 99% of the final model adjusted to functional dispersion data.


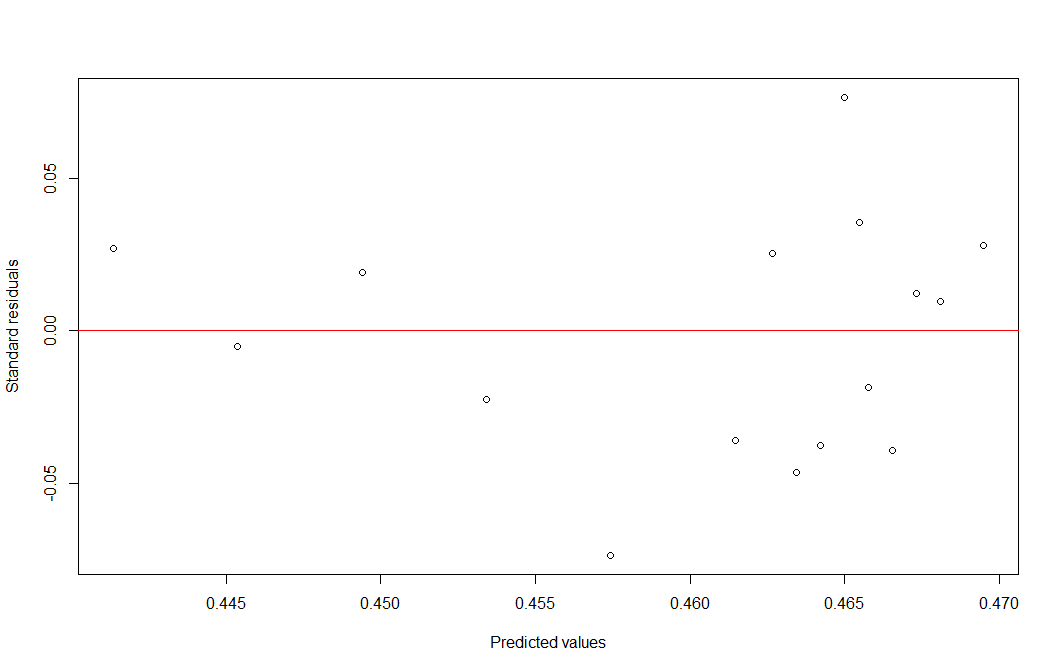


Figure 12. Scatter plot of the normalized residuals in relation to the predicted values for the final model adjusted to the functional dispersion data.

**Functional equity (FEve)**


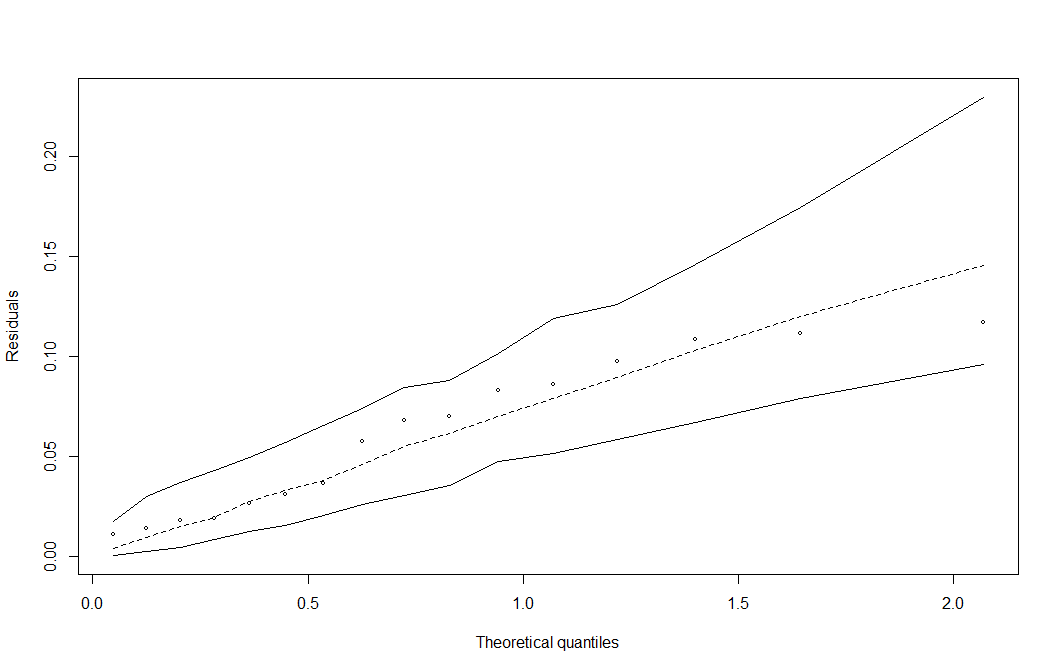


Figure 13. Quantile-quantile graph with envelopes simulated to 99% of the final model adjusted to functional equitability data.


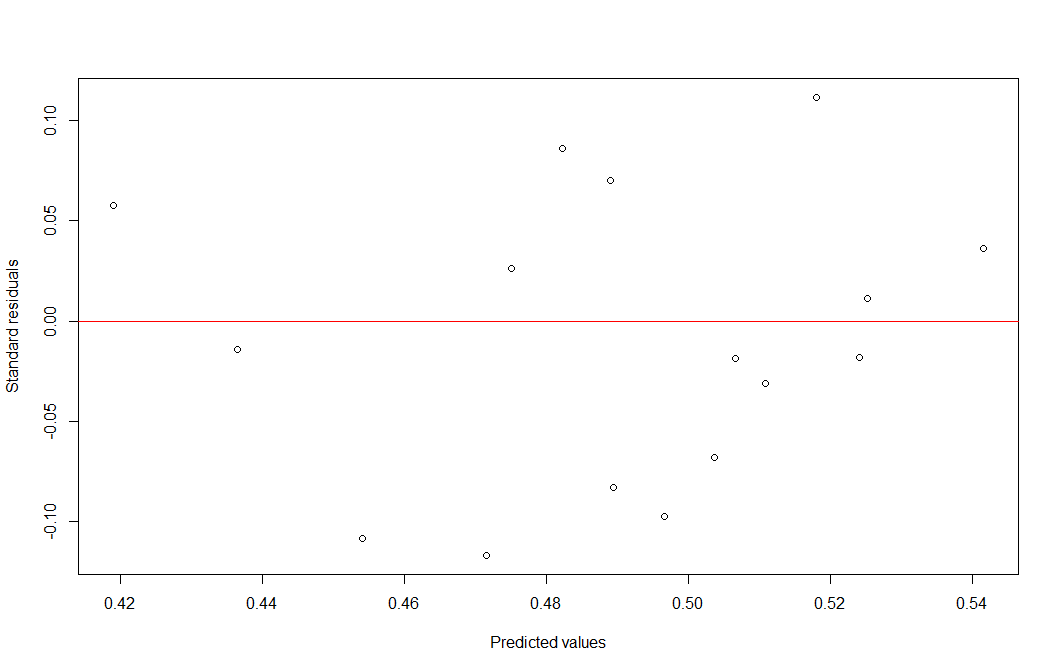


Figure 14. Scatter plot of the normalized residuals in relation to the predicted values for the final model adjusted to the functional equitability data.

**Functional redundancy (FR)**


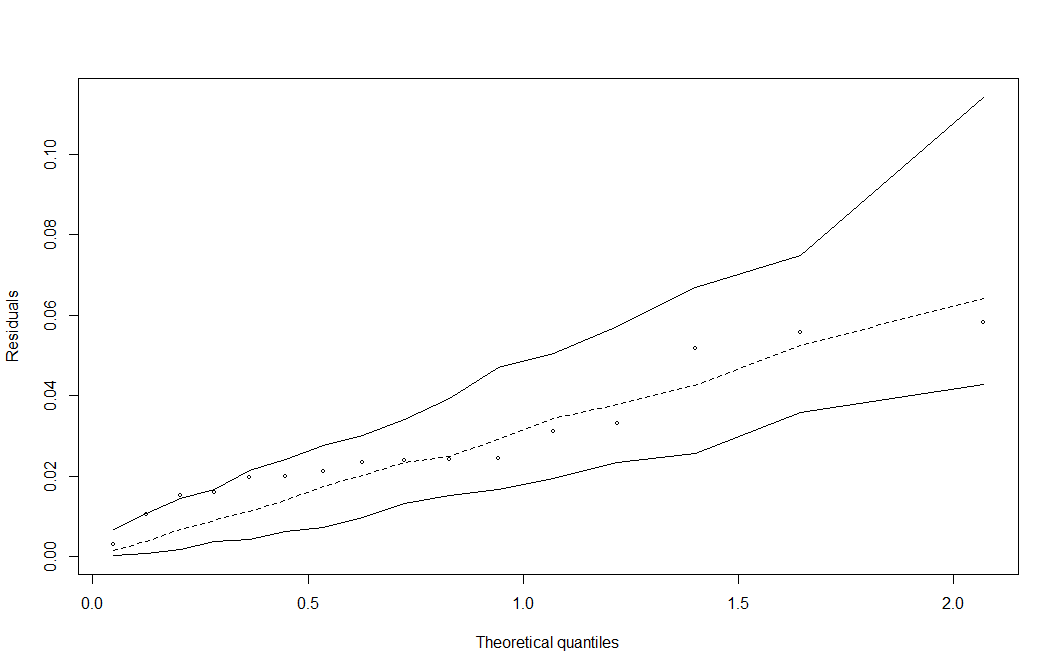


Figure 15. Quantile-quantile graph with envelopes simulated to 99% of the final model adjusted to functional redundancy data.


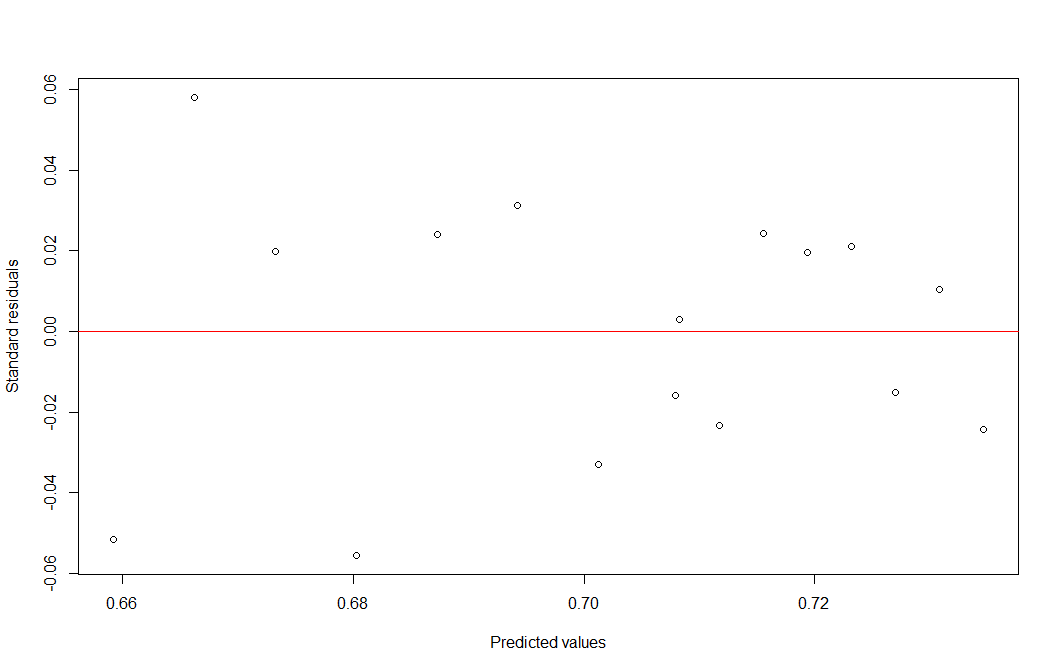


Figure 16. Scatter plot of the normalized residuals in relation to the predicted values for the final model adjusted to the functional equitability data.

**Supplementary Material S4**

Table 1. Abundance of fish species sampled in lakes with unrestricted and restricted access for fishing. O1=Unrestricted 2011, O2=Unrestricted 2013; O3=Unrestricted 2014; O4=Unrestricted 2015; O5=Unrestricted 2016; O6=Unrestricted 2017; O7=Unrestricted 2018; O8=Unrestricted 2019; R1= Restricted 2011, R2= Restricted 2013; R3= Restricted 2014; R4= Restricted 2015; R5= Restricted 2016; R6= Restricted 2017; R7= Restricted 2018; R8= Restricted 2019.

|  | **O1** | **O2** | **O3** | **O4** | **O5** | **O6** | **O7** | **O8** | **R1** | **R2** | **R3** | **R4** | **R5** | **R6** | **R7** | **R8** |
| --- | --- | --- | --- | --- | --- | --- | --- | --- | --- | --- | --- | --- | --- | --- | --- | --- |
| *Osteoglossum bicirrhosum* | 1 | 0 | 2 | 3 | 1 | 1 | 6 | 2 | 0 | 0 | 2 | 0 | 11 | 6 | 13 | 2 |
| *Ilisha amazonica* | 0 | 0 | 2 | 2 | 0 | 0 | 0 | 0 | 1 | 0 | 0 | 0 | 0 | 0 | 0 | 1 |
| *Pellona castelnaeana* | 7 | 0 | 2 | 4 | 0 | 6 | 0 | 10 | 1 | 17 | 6 | 27 | 6 | 2 | 6 | 3 |
| *Pellona flavipinnis* | 11 | 10 | 73 | 70 | 4 | 11 | 2 | 5 | 0 | 31 | 4 | 19 | 15 | 23 | 48 | 3 |
| *Pristigaster cayana* | 0 | 0 | 0 | 1 | 0 | 0 | 0 | 0 | 0 | 0 | 0 | 4 | 91 | 0 | 26 | 0 |
| *Jurengraulis juruensis* | 0 | 0 | 9 | 2 | 0 | 0 | 0 | 0 | 0 | 0 | 0 | 0 | 0 | 0 | 0 | 0 |
| *Lycengraulis batesii* | 1 | 0 | 0 | 8 | 0 | 0 | 0 | 0 | 0 | 0 | 2 | 0 | 0 | 0 | 0 | 0 |
| *Anodus elongatus* | 14 | 5 | 106 | 72 | 0 | 0 | 0 | 5 | 0 | 0 | 0 | 0 | 0 | 0 | 17 | 12 |
| *Hemiodus argenteus* | 1 | 0 | 2 | 4 | 0 | 5 | 0 | 0 | 0 | 0 | 0 | 0 | 0 | 0 | 0 | 0 |
| *Hemiodus atranalis* | 0 | 0 | 0 | 6 | 1 | 0 | 0 | 0 | 0 | 0 | 0 | 0 | 0 | 0 | 0 | 0 |
| *Hemiodus immaculatus* | 0 | 0 | 4 | 11 | 0 | 0 | 0 | 0 | 0 | 0 | 3 | 1 | 0 | 2 | 18 | 0 |
| *Hemiodus unimaculatus* | 0 | 0 | 0 | 0 | 0 | 0 | 0 | 0 | 0 | 0 | 0 | 0 | 1 | 1 | 0 | 0 |
| *Curimata inornata* | 0 | 0 | 0 | 0 | 0 | 0 | 0 | 0 | 1 | 0 | 0 | 0 | 0 | 1 | 3 | 4 |
| *Curimata knerii* | 0 | 0 | 4 | 6 | 1 | 0 | 0 | 1 | 0 | 0 | 0 | 0 | 0 | 0 | 0 | 0 |
| *Curimata ocellata* | 0 | 0 | 0 | 0 | 0 | 0 | 0 | 0 | 0 | 0 | 0 | 0 | 0 | 8 | 0 | 0 |
| *Curimata vittata* | 0 | 0 | 1 | 5 | 0 | 0 | 0 | 0 | 0 | 0 | 0 | 0 | 1 | 7 | 4 | 5 |
| *Curimatella alburna* | 0 | 0 | 0 | 7 | 1 | 1 | 0 | 0 | 0 | 0 | 0 | 0 | 0 | 0 | 0 | 0 |
| *Curimatella meyeri* | 0 | 0 | 20 | 45 | 0 | 7 | 2 | 0 | 0 | 0 | 0 | 0 | 22 | 10 | 5 | 27 |
| *Cyphocharax spiluropsis* | 0 | 0 | 0 | 0 | 1 | 0 | 0 | 0 | 0 | 0 | 0 | 0 | 0 | 0 | 0 | 0 |
| *Potamorhina altamazonica* | 2 | 0 | 5 | 2 | 0 | 14 | 0 | 7 | 0 | 30 | 0 | 4 | 199 | 144 | 82 | 34 |
| *Potamorhina latior* | 5 | 0 | 2 | 20 | 1 | 91 | 17 | 1 | 1 | 23 | 3 | 3 | 9 | 212 | 32 | 34 |
| *Psectrogaster amazonica* | 0 | 0 | 7 | 9 | 0 | 10 | 2 | 1 | 1 | 1 | 0 | 2 | 0 | 56 | 36 | 28 |
| *Psectrogaster rutiloides* | 2 | 0 | 33 | 72 | 7 | 118 | 47 | 114 | 0 | 13 | 0 | 0 | 6 | 4 | 149 | 34 |
| *Steindachnerina bimaculata* | 0 | 0 | 0 | 2 | 0 | 1 | 0 | 0 | 0 | 0 | 0 | 0 | 0 | 1 | 0 | 0 |
| *Prochilodus nigricans* | 1 | 1 | 2 | 3 | 2 | 11 | 1 | 8 | 0 | 0 | 3 | 0 | 18 | 43 | 66 | 16 |
| *Semaprochilodus insignis* | 2 | 1 | 5 | 2 | 26 | 1 | 2 | 13 | 0 | 1 | 1 | 0 | 10 | 32 | 43 | 56 |
| *Semaprochilodus taeniurus* | 2 | 1 | 10 | 11 | 10 | 2 | 1 | 3 | 0 | 13 | 0 | 6 | 36 | 9 | 39 | 28 |
| *Leporinus amazonicus* | 2 | 0 | 0 | 0 | 0 | 0 | 0 | 0 | 0 | 0 | 0 | 0 | 0 | 0 | 0 | 0 |
| *Laemolyta proxima* | 0 | 0 | 0 | 11 | 3 | 0 | 1 | 0 | 0 | 0 | 0 | 0 | 0 | 0 | 0 | 0 |
| *Leporinus fasciatus* | 0 | 0 | 0 | 0 | 0 | 0 | 0 | 0 | 0 | 1 | 0 | 6 | 4 | 1 | 6 | 0 |
| *Leporinus friderici* | 1 | 0 | 0 | 2 | 0 | 8 | 0 | 0 | 0 | 1 | 0 | 5 | 0 | 14 | 3 | 2 |
| *Megaleporinus trifasciatus* | 2 | 0 | 3 | 5 | 4 | 5 | 1 | 1 | 0 | 2 | 0 | 0 | 3 | 6 | 0 | 0 |
| *Rhytiodus argenteofuscus* | 0 | 0 | 2 | 0 | 0 | 0 | 0 | 0 | 0 | 12 | 0 | 0 | 0 | 0 | 0 | 0 |
| *Rhytiodus microlepis* | 6 | 6 | 29 | 93 | 3 | 8 | 7 | 2 | 2 | 2 | 16 | 12 | 60 | 28 | 44 | 9 |
| *Schizodon fasciatus* | 0 | 0 | 10 | 50 | 0 | 4 | 14 | 1 | 0 | 6 | 1 | 0 | 19 | 26 | 45 | 1 |
| *Schizodon vittatus* | 0 | 0 | 0 | 0 | 0 | 0 | 0 | 0 | 0 | 6 | 0 | 0 | 23 | 22 | 5 | 0 |
| *Hoplerythrinus unitaeniatus* | 0 | 0 | 0 | 1 | 0 | 0 | 0 | 2 | 0 | 0 | 3 | 0 | 0 | 13 | 0 | 0 |
| *Hoplias malabaricus* | 3 | 0 | 0 | 52 | 1 | 10 | 5 | 1 | 0 | 1 | 1 | 1 | 4 | 13 | 38 | 7 |
| *Acestrorhynchus abbreviatus* | 0 | 0 | 0 | 1 | 0 | 1 | 0 | 0 | 0 | 0 | 0 | 0 | 0 | 0 | 0 | 0 |
| *Acestrorhynchus falcatus* | 0 | 0 | 0 | 0 | 0 | 0 | 0 | 0 | 0 | 0 | 0 | 0 | 8 | 6 | 9 | 2 |
| *Acestrorhynchus falcirostris* | 20 | 2 | 17 | 288 | 21 | 12 | 17 | 2 | 3 | 21 | 1 | 10 | 58 | 69 | 45 | 7 |
| *Acestrorhynchus microlepis* | 1 | 1 | 0 | 4 | 1 | 0 | 0 | 0 | 0 | 0 | 0 | 0 | 0 | 0 | 0 | 0 |
| *Cynodon gibbus* | 0 | 0 | 1 | 1 | 0 | 0 | 0 | 0 | 0 | 0 | 0 | 0 | 0 | 0 | 1 | 0 |
| *Hydrolycus scomberoides* | 1 | 0 | 1 | 2 | 0 | 4 | 0 | 0 | 1 | 2 | 1 | 2 | 2 | 1 | 0 | 0 |
| *Rhaphiodon vulpinus* | 7 | 1 | 13 | 11 | 0 | 9 | 1 | 1 | 4 | 56 | 7 | 15 | 0 | 2 | 32 | 13 |
| *Brycon amazonicus* | 1 | 1 | 1 | 2 | 2 | 0 | 0 | 0 | 0 | 33 | 0 | 0 | 18 | 7 | 6 | 5 |
| *Brycon melanopterus* | 12 | 0 | 2 | 0 | 0 | 3 | 2 | 1 | 0 | 0 | 0 | 0 | 0 | 0 | 0 | 0 |
| *Bryconops melanurus* | 0 | 0 | 0 | 0 | 0 | 0 | 0 | 0 | 0 | 0 | 0 | 0 | 0 | 1 | 0 | 0 |
| *Colossoma macropomum* | 0 | 1 | 2 | 14 | 0 | 2 | 0 | 0 | 0 | 3 | 4 | 2 | 1 | 34 | 119 | 7 |
| *Metynnis argenteus* | 0 | 0 | 0 | 0 | 0 | 0 | 0 | 0 | 0 | 19 | 0 | 3 | 3 | 2 | 0 | 0 |
| *Metynnis hypsauchen* | 0 | 0 | 0 | 0 | 0 | 0 | 0 | 0 | 0 | 0 | 1 | 2 | 6 | 22 | 2 | 3 |
| *Myloplus asterias* | 0 | 0 | 0 | 0 | 0 | 0 | 0 | 0 | 0 | 0 | 0 | 0 | 0 | 0 | 1 | 0 |
| *Myloplus rubripinnis* | 0 | 0 | 0 | 0 | 0 | 0 | 0 | 0 | 0 | 0 | 1 | 0 | 0 | 1 | 0 | 0 |
| *Mylossoma albiscopum* | 13 | 1 | 3 | 6 | 0 | 1 | 3 | 1 | 9 | 65 | 5 | 27 | 72 | 98 | 109 | 29 |
| *Mylossoma aureum* | 0 | 0 | 1 | 5 | 0 | 1 | 0 | 0 | 6 | 56 | 1 | 52 | 21 | 5 | 35 | 1 |
| *Piaractus brachypomus* | 0 | 0 | 0 | 0 | 0 | 0 | 0 | 0 | 0 | 1 | 0 | 2 | 1 | 16 | 7 | 1 |
| *Pygocentrus nattereri* | 6 | 2 | 3 | 6 | 8 | 1 | 0 | 1 | 7 | 17 | 17 | 10 | 32 | 62 | 80 | 22 |
| *Serrasalmus altispinis* | 0 | 0 | 0 | 0 | 0 | 0 | 0 | 0 | 0 | 4 | 3 | 15 | 84 | 38 | 19 | 3 |
| *Serrasalmus compressus* | 0 | 0 | 0 | 0 | 0 | 0 | 0 | 0 | 0 | 0 | 0 | 0 | 0 | 4 | 19 | 0 |
| *Serrasalmus elongatus* | 6 | 1 | 3 | 3 | 0 | 1 | 1 | 5 | 1 | 10 | 5 | 7 | 17 | 10 | 7 | 10 |
| *Serrasalmus hollandi* | 0 | 0 | 0 | 1 | 0 | 0 | 0 | 0 | 0 | 0 | 0 | 0 | 0 | 1 | 3 | 0 |
| *Serrasalmus maculatus* | 1 | 0 | 2 | 5 | 9 | 7 | 3 | 1 | 0 | 0 | 0 | 0 | 0 | 1 | 78 | 7 |
| *Serrasalmus rhombeus* | 0 | 0 | 1 | 5 | 7 | 3 | 1 | 3 | 1 | 36 | 11 | 3 | 7 | 14 | 7 | 3 |
| *Serrasalmus spilopleura* | 0 | 0 | 0 | 0 | 0 | 0 | 0 | 0 | 0 | 5 | 2 | 1 | 74 | 72 | 0 | 0 |
| *Chalceus erythrurus* | 0 | 1 | 1 | 7 | 1 | 1 | 4 | 0 | 0 | 0 | 1 | 11 | 1 | 0 | 0 | 0 |
| *Chalceus macrolepidotus* | 0 | 0 | 0 | 0 | 0 | 0 | 0 | 0 | 0 | 10 | 0 | 0 | 7 | 45 | 0 | 0 |
| *Roeboides myersii* | 0 | 0 | 2 | 3 | 0 | 4 | 1 | 1 | 0 | 3 | 0 | 1 | 11 | 15 | 7 | 1 |
| *Tetragonopterus argenteus* | 0 | 0 | 0 | 0 | 0 | 0 | 0 | 0 | 0 | 0 | 0 | 0 | 0 | 2 | 2 | 0 |
| *Agoniates anchovia* | 0 | 0 | 1 | 1 | 0 | 0 | 0 | 0 | 0 | 0 | 0 | 0 | 0 | 0 | 3 | 0 |
| *Triportheus albus* | 15 | 0 | 38 | 252 | 59 | 104 | 4 | 22 | 5 | 13 | 23 | 7 | 386 | 290 | 290 | 11 |
| *Triportheus angulatus* | 5 | 6 | 12 | 84 | 4 | 83 | 29 | 45 | 2 | 99 | 8 | 30 | 149 | 156 | 174 | 21 |
| *Triportheus auritus* | 1 | 13 | 18 | 19 | 7 | 1 | 6 | 0 | 0 | 0 | 0 | 0 | 0 | 0 | 28 | 10 |
| *Triportheus elongatus* | 0 | 0 | 0 | 0 | 0 | 0 | 0 | 0 | 2 | 43 | 8 | 34 | 70 | 24 | 2 | 0 |
| *Amblydoras affinis* | 0 | 0 | 0 | 0 | 0 | 0 | 0 | 0 | 0 | 0 | 0 | 0 | 0 | 1 | 0 | 3 |
| *Anadoras grypus* | 0 | 0 | 8 | 33 | 2 | 3 | 0 | 1 | 0 | 0 | 0 | 0 | 0 | 0 | 0 | 0 |
| *Nemadoras elongatus* | 0 | 0 | 1 | 0 | 0 | 0 | 0 | 0 | 0 | 0 | 0 | 0 | 0 | 0 | 2 | 0 |
| *Nemadoras hemipeltis* | 0 | 0 | 0 | 0 | 0 | 2 | 0 | 1 | 0 | 0 | 0 | 0 | 0 | 0 | 0 | 0 |
| *Nemadoras humeralis* | 2 | 0 | 1 | 2 | 0 | 0 | 34 | 3 | 0 | 0 | 0 | 0 | 0 | 0 | 3 | 0 |
| *Opsodoras boulengeri* | 0 | 0 | 0 | 0 | 0 | 0 | 0 | 1 | 0 | 0 | 0 | 0 | 0 | 0 | 0 | 0 |
| *Ossancora asterophysa* | 0 | 0 | 0 | 2 | 1 | 1 | 0 | 0 | 0 | 0 | 0 | 0 | 0 | 0 | 0 | 0 |
| *Ossancora punctata* | 0 | 0 | 0 | 7 | 0 | 5 | 0 | 0 | 0 | 0 | 0 | 0 | 0 | 0 | 0 | 0 |
| *Oxydoras niger* | 0 | 0 | 0 | 2 | 0 | 0 | 1 | 0 | 4 | 3 | 2 | 0 | 0 | 3 | 21 | 1 |
| *Pterodoras granulosus* | 1 | 0 | 2 | 12 | 0 | 1 | 0 | 1 | 0 | 0 | 0 | 0 | 0 | 0 | 0 | 0 |
| *Pterodoras lentiginosus* | 0 | 0 | 0 | 0 | 0 | 0 | 0 | 0 | 0 | 0 | 0 | 0 | 0 | 8 | 13 | 5 |
| *Auchenipterichthys coracoideus* | 8 | 0 | 0 | 40 | 2 | 0 | 0 | 0 | 0 | 0 | 0 | 0 | 0 | 0 | 0 | 0 |
| *Ageneiosus dentatus* | 0 | 0 | 13 | 22 | 2 | 0 | 5 | 0 | 0 | 0 | 0 | 0 | 0 | 0 | 0 | 0 |
| *Ageneiosus inermis* | 0 | 0 | 1 | 2 | 1 | 0 | 0 | 0 | 3 | 6 | 2 | 2 | 1 | 2 | 0 | 0 |
| *Ageneiosus ucayalensis* | 0 | 0 | 3 | 2 | 1 | 3 | 0 | 0 | 7 | 0 | 23 | 17 | 0 | 29 | 0 | 0 |
| *Auchenipterus britskii* | 0 | 0 | 8 | 5 | 0 | 0 | 0 | 0 | 0 | 0 | 0 | 0 | 0 | 0 | 0 | 0 |
| *Auchenipterus nuchalis* | 0 | 4 | 10 | 21 | 5 | 5 | 5 | 2 | 0 | 6 | 0 | 6 | 0 | 3 | 1 | 2 |
| *Centromochlus heckelii* | 0 | 0 | 0 | 0 | 0 | 0 | 0 | 0 | 0 | 0 | 0 | 2 | 0 | 2 | 0 | 0 |
| *Trachelyopterus galeatus* | 5 | 0 | 1 | 5 | 5 | 1 | 4 | 0 | 9 | 26 | 15 | 8 | 0 | 0 | 24 | 54 |
| *Trachelyopterus porosus* | 1 | 5 | 6 | 67 | 10 | 20 | 0 | 4 | 0 | 0 | 0 | 0 | 0 | 0 | 0 | 0 |
| *Tympanopleura brevis* | 0 | 0 | 0 | 0 | 0 | 1 | 6 | 0 | 0 | 0 | 0 | 0 | 0 | 0 | 5 | 2 |
| *Tympanopleura rondoni* | 0 | 0 | 1 | 1 | 0 | 0 | 0 | 0 | 0 | 0 | 0 | 0 | 0 | 0 | 0 | 0 |
| *Calophysus macropterus* | 0 | 0 | 0 | 0 | 0 | 0 | 0 | 2 | 5 | 0 | 25 | 0 | 0 | 0 | 1 | 0 |
| *Hemisorubim platyrhynchos* | 0 | 0 | 0 | 0 | 0 | 0 | 0 | 1 | 0 | 0 | 0 | 0 | 0 | 0 | 1 | 0 |
| *Hypophthalmus edentatus* | 1 | 1 | 6 | 10 | 0 | 1 | 0 | 4 | 0 | 6 | 1 | 5 | 0 | 3 | 37 | 0 |
| *Hypophthalmus fimbriatus* | 0 | 0 | 4 | 5 | 0 | 0 | 0 | 2 | 0 | 0 | 0 | 0 | 0 | 1 | 0 | 0 |
| *Hypophthalmus marginatus* | 0 | 0 | 0 | 0 | 0 | 0 | 0 | 0 | 1 | 0 | 1 | 3 | 0 | 1 | 2 | 0 |
| *Hypophthalmus oremaculatus* | 2 | 1 | 1 | 5 | 0 | 0 | 0 | 0 | 0 | 0 | 0 | 0 | 0 | 0 | 0 | 0 |
| *Phractocephalus hemioliopterus* | 0 | 0 | 0 | 0 | 0 | 0 | 0 | 0 | 0 | 0 | 0 | 0 | 0 | 0 | 3 | 0 |
| *Pimelodina flavipinnis* | 0 | 0 | 0 | 0 | 0 | 0 | 0 | 0 | 0 | 0 | 0 | 0 | 1 | 0 | 0 | 0 |
| *Pimelodus blochii* | 4 | 0 | 4 | 20 | 0 | 5 | 3 | 3 | 2 | 1 | 2 | 4 | 3 | 21 | 201 | 26 |
| *Pimelodus maculatus* | 0 | 0 | 0 | 0 | 0 | 0 | 0 | 0 | 0 | 0 | 0 | 0 | 0 | 0 | 1 | 0 |
| *Pinirampus pirinampu* | 0 | 0 | 1 | 4 | 0 | 0 | 0 | 0 | 0 | 0 | 1 | 0 | 0 | 4 | 1 | 1 |
| *Pseudoplatystoma punctifer* | 0 | 0 | 0 | 2 | 0 | 1 | 0 | 0 | 0 | 2 | 0 | 0 | 0 | 0 | 1 | 0 |
| *Pseudoplatystoma tigrinum* | 0 | 2 | 1 | 2 | 0 | 0 | 0 | 0 | 0 | 2 | 0 | 0 | 0 | 1 | 0 | 0 |
| *Sorubim lima* | 0 | 0 | 2 | 1 | 1 | 1 | 2 | 0 | 0 | 11 | 1 | 1 | 0 | 7 | 0 | 8 |
| *Sorubim maniradii* | 2 | 0 | 2 | 2 | 2 | 4 | 0 | 0 | 0 | 0 | 0 | 0 | 0 | 0 | 0 | 1 |
| *Hoplosternum littorale* | 4 | 2 | 8 | 41 | 42 | 31 | 0 | 46 | 0 | 0 | 1 | 0 | 10 | 24 | 95 | 40 |
| *Megalechis picta* | 2 | 0 | 0 | 0 | 0 | 0 | 0 | 0 | 0 | 0 | 0 | 0 | 0 | 0 | 0 | 0 |
| *Ancistrus dolichopterus* | 3 | 0 | 0 | 0 | 0 | 2 | 0 | 0 | 0 | 0 | 0 | 0 | 0 | 1 | 0 | 0 |
| *Dekeyseria amazonica* | 3 | 0 | 5 | 4 | 2 | 5 | 4 | 0 | 0 | 0 | 2 | 2 | 0 | 2 | 0 | 0 |
| *Hypoptopoma gulare* | 1 | 0 | 0 | 0 | 0 | 0 | 0 | 0 | 0 | 0 | 0 | 1 | 0 | 0 | 2 | 0 |
| *Hypoptopoma incognitum* | 0 | 0 | 0 | 12 | 0 | 0 | 1 | 1 | 0 | 0 | 0 | 0 | 0 | 1 | 0 | 0 |
| *Loricaria cataphracta* | 0 | 0 | 0 | 0 | 0 | 0 | 0 | 0 | 0 | 0 | 0 | 0 | 1 | 3 | 36 | 1 |
| *Loricariichthys maculatus* | 0 | 0 | 0 | 3 | 0 | 0 | 0 | 11 | 0 | 0 | 0 | 0 | 0 | 0 | 0 | 0 |
| *Loricariichthys nudirostris* | 0 | 0 | 0 | 0 | 0 | 1 | 0 | 0 | 0 | 0 | 0 | 0 | 0 | 0 | 0 | 0 |
| *Pterygoplichthys pardalis* | 0 | 0 | 2 | 7 | 0 | 4 | 1 | 34 | 0 | 1 | 6 | 0 | 1 | 3 | 89 | 4 |
| *Parapteronotus hasemani* | 0 | 0 | 0 | 0 | 0 | 0 | 0 | 0 | 0 | 0 | 0 | 0 | 0 | 0 | 0 | 1 |
| *Sternarchella schotti* | 0 | 0 | 0 | 0 | 0 | 0 | 0 | 0 | 0 | 0 | 0 | 0 | 0 | 0 | 1 | 0 |
| *Rhamphichthys rostratus* | 0 | 0 | 0 | 0 | 0 | 0 | 0 | 0 | 0 | 0 | 0 | 0 | 0 | 1 | 0 | 0 |
| *Eigenmannia limbata* | 0 | 0 | 0 | 1 | 0 | 1 | 0 | 0 | 0 | 0 | 0 | 0 | 0 | 0 | 0 | 1 |
| *Sternopygus macrurus* | 0 | 0 | 0 | 0 | 0 | 1 | 0 | 0 | 0 | 0 | 0 | 0 | 0 | 0 | 0 | 0 |
| *Plagioscion montei* | 0 | 0 | 1 | 0 | 0 | 1 | 0 | 0 | 0 | 0 | 0 | 0 | 0 | 0 | 0 | 0 |
| *Plagioscion squamosissimus* | 1 | 0 | 6 | 10 | 4 | 1 | 0 | 0 | 1 | 42 | 0 | 3 | 4 | 7 | 2 | 2 |
| *Acaronia nassa* | 1 | 0 | 0 | 2 | 0 | 0 | 1 | 0 | 0 | 0 | 0 | 0 | 0 | 3 | 0 | 0 |
| *Acarichthys heckelii* | 0 | 1 | 0 | 2 | 7 | 0 | 9 | 0 | 0 | 0 | 0 | 0 | 25 | 36 | 7 | 0 |
| *Astronotus crassipinnis* | 0 | 0 | 0 | 1 | 1 | 0 | 0 | 0 | 0 | 0 | 0 | 0 | 1 | 1 | 1 | 0 |
| *Astronotus ocellatus* | 0 | 0 | 0 | 2 | 0 | 0 | 0 | 0 | 0 | 0 | 1 | 0 | 0 | 0 | 0 | 1 |
| *Chaetobranchopsis orbicularis* | 0 | 0 | 2 | 0 | 0 | 0 | 0 | 0 | 0 | 0 | 0 | 0 | 0 | 0 | 0 | 0 |
| *Chaetobranchus flavescens* | 0 | 0 | 0 | 1 | 7 | 0 | 0 | 0 | 0 | 0 | 1 | 0 | 0 | 1 | 0 | 0 |
| *Chaetobranchus semifasciatus* | 0 | 0 | 0 | 0 | 0 | 0 | 0 | 0 | 0 | 0 | 0 | 0 | 0 | 0 | 2 | 0 |
| *Cichla monoculus* | 2 | 0 | 4 | 23 | 2 | 1 | 0 | 0 | 0 | 5 | 1 | 0 | 3 | 7 | 12 | 0 |
| *Cichlasoma amazonarum* | 0 | 0 | 0 | 0 | 0 | 0 | 0 | 0 | 0 | 0 | 0 | 0 | 0 | 0 | 2 | 0 |
| *Crenicichla reticulata* | 0 | 0 | 0 | 0 | 0 | 0 | 1 | 0 | 0 | 0 | 0 | 0 | 0 | 0 | 0 | 0 |
| *Geophagus proximus* | 0 | 0 | 1 | 5 | 2 | 0 | 0 | 0 | 0 | 0 | 0 | 0 | 2 | 3 | 3 | 0 |
| *Heros notatus* | 0 | 2 | 1 | 7 | 9 | 0 | 0 | 0 | 0 | 0 | 0 | 0 | 0 | 1 | 0 | 0 |
| *Heros severus* | 0 | 0 | 0 | 0 | 0 | 0 | 0 | 0 | 0 | 0 | 0 | 0 | 1 | 5 | 5 | 1 |
| *Mesonauta festivus* | 0 | 0 | 1 | 9 | 10 | 3 | 0 | 0 | 0 | 4 | 1 | 0 | 0 | 4 | 14 | 3 |
| *Pterophyllum scalare* | 0 | 0 | 0 | 2 | 1 | 1 | 0 | 1 | 1 | 0 | 0 | 0 | 1 | 0 | 0 | 0 |
| *Satanoperca acuticeps* | 0 | 0 | 0 | 0 | 0 | 0 | 0 | 0 | 0 | 0 | 0 | 0 | 0 | 1 | 5 | 0 |
| *Satanoperca jurupari* | 0 | 2 | 5 | 4 | 4 | 0 | 2 | 0 | 0 | 0 | 0 | 0 | 1 | 6 | 8 | 0 |
| *Lepidosiren paradoxa* | 0 | 0 | 0 | 0 | 0 | 0 | 0 | 0 | 0 | 0 | 0 | 0 | 0 | 0 | 3 | 0 |

**Supplementary Material S5**

| Table 1.Scores of the PCA objects | | | | | | | | | | | | | | | | |
| --- | --- | --- | --- | --- | --- | --- | --- | --- | --- | --- | --- | --- | --- | --- | --- | --- |
| **Access** | **PC1** | **PC2** | **PC3** | **PC4** | **PC5** | **PC6** | **PC7** | **PC8** | **PC9** | **PC10** | **PC11** | **PC12** | **PC13** | **PC14** | **PC15** | **PC16** |
| **Unrestricted** | 0.213 | -1.103 | 0.535 | 1.662 | 0.566 | 0.338 | -0.357 | -1.235 | 1.345 | -0.618 | 0.658 | 0.493 | -0.242 | -0.235 | -0.172 | 0.000 |
| **Unrestricted** | -0.200 | 0.002 | -3.697 | 0.476 | 1.034 | 0.238 | 0.449 | -0.051 | -0.555 | -0.297 | 0.112 | 0.307 | 0.139 | 0.455 | -0.176 | 0.000 |
| **Unrestricted** | 1.230 | 0.909 | 0.101 | 3.269 | 2.780 | 1.615 | 0.348 | -0.249 | -0.566 | 1.073 | 0.138 | -0.291 | -0.079 | -0.074 | 0.112 | 0.000 |
| **Unrestricted** | 1.913 | 0.259 | -0.120 | 2.432 | -0.882 | -0.978 | 1.467 | -0.948 | 0.401 | -0.814 | -1.181 | -0.128 | 0.338 | -0.075 | 0.062 | 0.000 |
| **Unrestricted** | 1.855 | -3.690 | -4.052 | -2.066 | 0.274 | -0.773 | -1.072 | -0.637 | 0.267 | 0.206 | 0.004 | -0.416 | -0.082 | -0.176 | 0.106 | 0.000 |
| **Unrestricted** | 2.493 | 2.461 | 0.588 | -0.974 | 0.412 | -1.562 | 1.407 | 0.751 | -0.908 | -0.893 | 0.846 | -0.460 | -0.204 | -0.123 | -0.063 | 0.000 |
| **Unrestricted** | 2.399 | 1.569 | 1.265 | 1.460 | -2.118 | -1.543 | -1.735 | -1.005 | -0.245 | 0.522 | 0.452 | 0.112 | -0.123 | 0.294 | 0.100 | 0.000 |
| **Unrestricted** | 4.854 | -1.081 | 0.631 | 0.593 | -0.684 | 1.079 | -1.414 | 2.660 | 0.205 | -0.162 | -0.374 | 0.054 | 0.098 | -0.040 | -0.079 | 0.000 |
| **Restricted** | -4.346 | -3.022 | 0.984 | 0.897 | -0.347 | -1.185 | -0.615 | 0.162 | -1.588 | 0.396 | -0.023 | 0.220 | 0.233 | -0.248 | -0.097 | 0.000 |
| **Restricted** | -3.613 | 1.302 | 1.315 | -0.758 | 1.172 | 0.411 | -1.359 | 0.013 | 0.779 | -0.748 | 0.575 | -0.506 | 0.465 | 0.101 | 0.060 | 0.000 |
| **Restricted** | -3.134 | -3.727 | 0.386 | 0.866 | -1.542 | -0.003 | 1.928 | 1.274 | 0.884 | 0.409 | 0.484 | -0.150 | -0.156 | 0.181 | 0.091 | 0.000 |
| **Restricted** | -4.293 | 1.536 | 0.077 | -0.073 | 0.601 | -0.034 | -0.936 | 0.433 | -0.133 | -0.694 | -1.151 | -0.066 | -0.547 | 0.068 | 0.036 | 0.000 |
| **Restricted** | -1.439 | 4.450 | -2.078 | -1.010 | -0.575 | 0.003 | 0.398 | 0.848 | 0.279 | 0.358 | 0.232 | 0.752 | 0.126 | -0.219 | 0.158 | 0.000 |
| **Restricted** | -0.424 | 2.508 | 0.596 | -1.805 | -0.431 | -0.330 | 0.403 | -0.358 | 0.781 | 1.545 | -0.512 | -0.377 | 0.031 | -0.018 | -0.236 | 0.000 |
| **Restricted** | 0.179 | -0.120 | 0.460 | -1.774 | -2.475 | 3.094 | 0.417 | -1.261 | -0.902 | -0.389 | 0.067 | -0.089 | -0.027 | -0.032 | 0.007 | 0.000 |
| **Restricted** | 2.313 | -2.254 | 3.007 | -3.196 | 2.216 | -0.372 | 0.671 | -0.396 | -0.044 | 0.106 | -0.328 | 0.544 | 0.030 | 0.142 | 0.090 | 0.000 |

| Table 2. Scores of the atributes of the PCA. DET, detritivore; HERB, herbivore; INV, invertivore; OMN, omnivore, PIS, piscivore; PLAN, planktivore; LEL, large equilibrium strategist; LES, small equilibrium strategist; LIN, intermediate; LPL, large periodic; LPS, small periodic; LOM, local migrant; REM, regional migrant; SEM, sedentary; BAN, anguilliform body; CIB, cylindrical body; CLB, cylindrical and elongated body; COAB, compressed and elongated body; DEB, depressed body; ELB, elliptical body; FUB, fusiform body; FCLB, fusiform and laterally compressed body; MDB, moderately depressed body; ROB, rhomboid body; INM, lower mouth; SUM, upper mouth; TEM, terminal mouth. | | | | | | | | | | | | | | | | |
| --- | --- | --- | --- | --- | --- | --- | --- | --- | --- | --- | --- | --- | --- | --- | --- | --- |
| **Traits** | **PC1** | **PC2** | **PC3** | **PC4** | **PC5** | **PC6** | **PC7** | **PC8** | **PC9** | **PC10** | **PC11** | **PC12** | **PC13** | **PC14** | **PC15** | **PC16** |
| **DET** | 0.280 | 0.061 | 0.216 | -0.209 | -0.029 | 0.005 | -0.049 | 0.275 | -0.079 | 0.123 | 0.064 | -0.010 | -0.114 | -0.174 | -0.115 | -0.164 |
| **HERB** | -0.320 | 0.068 | 0.130 | 0.003 | -0.028 | 0.093 | -0.125 | -0.159 | -0.087 | -0.123 | -0.447 | 0.083 | 0.145 | 0.470 | -0.081 | -0.065 |
| **INV** | 0.241 | -0.092 | -0.355 | -0.074 | 0.088 | -0.017 | -0.030 | 0.140 | -0.117 | -0.252 | -0.122 | 0.008 | 0.155 | 0.091 | 0.140 | -0.437 |
| **OMN** | -0.069 | 0.134 | -0.279 | -0.169 | -0.344 | -0.283 | -0.063 | -0.286 | -0.058 | -0.079 | 0.368 | 0.242 | 0.244 | -0.073 | -0.001 | 0.113 |
| **PIS** | -0.286 | -0.153 | 0.010 | 0.233 | 0.008 | -0.075 | 0.134 | -0.070 | 0.285 | -0.039 | 0.026 | -0.147 | -0.038 | -0.091 | 0.132 | -0.443 |
| **PLAN** | 0.077 | -0.006 | -0.095 | 0.336 | 0.388 | 0.347 | 0.116 | -0.191 | -0.072 | 0.228 | 0.037 | -0.063 | -0.222 | 0.046 | 0.011 | 0.130 |
| **LEL** | 0.182 | -0.094 | 0.106 | 0.061 | -0.340 | 0.344 | -0.105 | 0.445 | 0.166 | -0.032 | -0.020 | -0.104 | 0.087 | 0.125 | 0.325 | 0.071 |
| **LES** | 0.136 | -0.126 | -0.389 | -0.058 | -0.074 | -0.103 | -0.264 | -0.265 | 0.056 | 0.229 | 0.190 | -0.406 | -0.369 | 0.286 | 0.036 | -0.110 |
| **LIN** | -0.137 | -0.349 | -0.056 | -0.113 | -0.065 | -0.191 | 0.127 | 0.155 | 0.094 | 0.106 | -0.101 | 0.144 | -0.173 | -0.204 | 0.291 | -0.159 |
| **LPL** | -0.200 | -0.257 | 0.153 | -0.129 | 0.208 | 0.160 | -0.079 | 0.018 | 0.166 | -0.261 | 0.187 | -0.008 | -0.068 | -0.014 | -0.518 | -0.121 |
| **LPS** | 0.116 | 0.378 | 0.025 | 0.134 | 0.005 | -0.020 | 0.058 | -0.111 | -0.186 | 0.032 | -0.089 | 0.045 | 0.206 | 0.025 | 0.051 | -0.285 |
| **LOM** | -0.223 | 0.270 | 0.143 | 0.153 | -0.097 | -0.092 | 0.044 | 0.111 | -0.118 | 0.181 | 0.107 | -0.012 | -0.183 | 0.049 | 0.071 | -0.346 |
| **REM** | 0.122 | -0.129 | 0.002 | -0.385 | 0.178 | 0.265 | -0.022 | -0.260 | 0.297 | 0.019 | 0.032 | 0.487 | -0.014 | 0.244 | 0.246 | -0.149 |
| **SEM** | 0.225 | -0.283 | -0.188 | 0.010 | 0.030 | -0.024 | -0.045 | -0.003 | -0.008 | -0.247 | -0.157 | -0.250 | 0.247 | -0.197 | -0.227 | 0.007 |
| **ANB** | 0.136 | 0.019 | 0.229 | -0.273 | 0.204 | -0.237 | 0.394 | -0.016 | -0.276 | -0.278 | 0.105 | 0.021 | -0.342 | 0.027 | 0.058 | -0.022 |
| **CIB** | 0.138 | -0.004 | 0.185 | 0.082 | -0.369 | -0.164 | 0.379 | -0.285 | 0.368 | -0.254 | -0.229 | -0.213 | -0.144 | 0.141 | -0.001 | 0.093 |
| **CLB** | 0.006 | -0.006 | 0.037 | -0.151 | -0.321 | 0.570 | 0.090 | -0.316 | -0.400 | -0.208 | 0.051 | -0.164 | -0.121 | -0.221 | 0.122 | -0.111 |
| **COAB** | -0.250 | -0.077 | 0.249 | 0.131 | 0.135 | -0.004 | -0.213 | -0.033 | -0.021 | -0.329 | 0.487 | -0.206 | 0.206 | 0.049 | 0.320 | -0.031 |
| **DEB** | 0.186 | -0.070 | 0.188 | 0.235 | -0.357 | 0.015 | -0.325 | 0.004 | 0.023 | -0.040 | 0.134 | 0.340 | -0.307 | 0.067 | -0.294 | -0.188 |
| **ELB** | -0.295 | 0.023 | -0.050 | -0.162 | 0.030 | -0.049 | -0.373 | -0.089 | -0.066 | -0.049 | -0.402 | -0.009 | -0.253 | -0.392 | 0.166 | 0.019 |
| **FCLB** | -0.070 | 0.268 | -0.364 | 0.004 | 0.022 | 0.102 | 0.159 | 0.220 | 0.049 | -0.222 | 0.012 | -0.014 | -0.073 | 0.107 | -0.221 | -0.265 |
| **FUB** | 0.294 | 0.146 | 0.123 | 0.094 | 0.197 | 0.003 | 0.047 | -0.164 | 0.253 | 0.045 | 0.067 | 0.001 | 0.166 | -0.162 | 0.149 | -0.109 |
| **MDB** | -0.056 | -0.376 | 0.006 | -0.002 | -0.036 | -0.132 | 0.136 | 0.153 | -0.410 | 0.079 | 0.030 | 0.000 | 0.032 | 0.415 | 0.078 | 0.078 |
| **ROB** | -0.180 | -0.133 | 0.097 | -0.315 | -0.170 | 0.142 | 0.261 | -0.069 | 0.035 | 0.502 | 0.060 | -0.179 | 0.311 | -0.055 | -0.223 | -0.206 |
| **INM** | 0.091 | -0.302 | 0.021 | 0.337 | -0.029 | -0.047 | 0.061 | -0.174 | -0.184 | 0.046 | -0.058 | 0.217 | 0.101 | -0.137 | -0.031 | -0.214 |
| **SUM** | -0.226 | 0.189 | -0.253 | -0.099 | -0.059 | 0.180 | 0.187 | 0.217 | 0.179 | -0.089 | 0.129 | 0.039 | -0.145 | 0.020 | 0.028 | 0.096 |
| **TEM** | 0.144 | 0.161 | 0.262 | -0.308 | 0.103 | -0.147 | -0.290 | -0.030 | 0.025 | 0.044 | -0.075 | -0.315 | 0.040 | 0.148 | 0.007 | -0.167 |
